# Supplementary material for: Conformationally dynamic titanium and zirconium cationic complexes of bis(naphthoxy)pyridine ligands: structure, “oscillation” and olefin polymerization catalysis
Source: Royal Society of Chemistry journal article supplement (doi:10.1039/c6dt04680k), 2017-01-01
Supplement: c6dt04680k1.pdf [file c6dt04680k1.pdf]

Supporting information for

## Conformationally Dynamic Titanium and Zirconium Cationic Complexes of

### Bis(naphthoxy)pyridine ligands: Structure, “Oscillation” and Olefin Polymerization Catalysis

Liana Annunziata, Thierry Roisnel, Abbas Razavi, Jean-François Carpentier,\* and Evgueni Kirillov\*

**Figure S1.**  $^1\text{H}$  NMR spectrum of complex **2-Ti**.

**Figure S2.**  $^{13}\text{C}$  NMR spectrum of complex **2-Ti**.

**Figure S3.**  $^{19}\text{F}$  NMR spectrum of complex **2-Ti**.

**Figure S4.** Stack plot of  $^1\text{H}$  NMR spectra of complex **2-Ti**.

**Figure S5.** Stack plot of  $^{29}\text{Si}\{^1\text{H}\}$  NMR spectra of complex **2-Ti**.

**Figure S6.** Result of deconvolution of  $^{29}\text{Si}\{^1\text{H}\}$  NMR spectrum of complex **2-Ti**.

**Figure S7.**  $^1\text{H}$  NMR spectrum of complex **2-Zr**.

**Figure S8.** Stack plot of  $^1\text{H}$  NMR spectra of complex **2-Zr**.

**Figure S9.**  $^1\text{H}$  NMR spectrum of complex **2-Zr**.

**Figure S10.** Low-field portion of the  $^1\text{H}$ - $^1\text{H}$  COSY NMR spectrum of complex **2-Zr**.

**Figure S11.**  $^1\text{H}$ - $^{13}\text{C}$  HMQC NMR spectrum of complex **2-Zr**.

**Figure S12.** Stack plot of  $^{19}\text{F}\{^1\text{H}\}$  NMR spectra of complex **2-Zr**.

**Figure S13.** Stack plot of  $^{29}\text{Si}\{^1\text{H}\}$  NMR spectra of complex **2-Zr**.

**Figure S14.**  $^1\text{H}$  NMR spectrum of complex **3**.

**Figure S15.**  $^{13}\text{C}$  NMR spectrum of complex **3**.

**Figure S16.**  $^1\text{H}$  NMR spectrum of oligopropylene sample prepared with **3**/MAO system.

**Figure S17.** Aliphatic portion of the  $^{13}\text{C}\{^1\text{H}\}$  NMR spectrum of oligopropylene sample prepared with **3**/MAO system.

**Figure S18.** The *ipso*-carbon region of the  $^{13}\text{C}\{^1\text{H}\}$  NMR spectrum of polystyrene sample prepared with **3**/MAO system.

**Table S1.** Summary of Crystal and Refinement Data for Compounds **2-Zr** and **3**.

**Figure S19.** DFT data obtained from B3PW91 level calculations for OSIP **2-Ti- $C_s$ -decoord(1)**.

**Figure S20.** DFT data obtained from B3PW91 level calculations for OSIP **2-Zr- $C_s$ -decoord(1)**.

#### Additional results on the polymerization activity studies.

**Table S2.** Propylene Polymerization Promoted by **1-Zr** and **3**.

**Table S3.** Styrene Polymerization Promoted by **1-Ti**, **1-Zr**, **2-Ti**, **2-Zr** and **3**.

#### References

---

\* Corresponding authors: Fax: (+33)(0)223-236-939. E-mail: [jean-francois.carpentier@univ-rennes1.fr](mailto:jean-francois.carpentier@univ-rennes1.fr); [evgueni.kirillov@univ-rennes1.fr](mailto:evgueni.kirillov@univ-rennes1.fr).

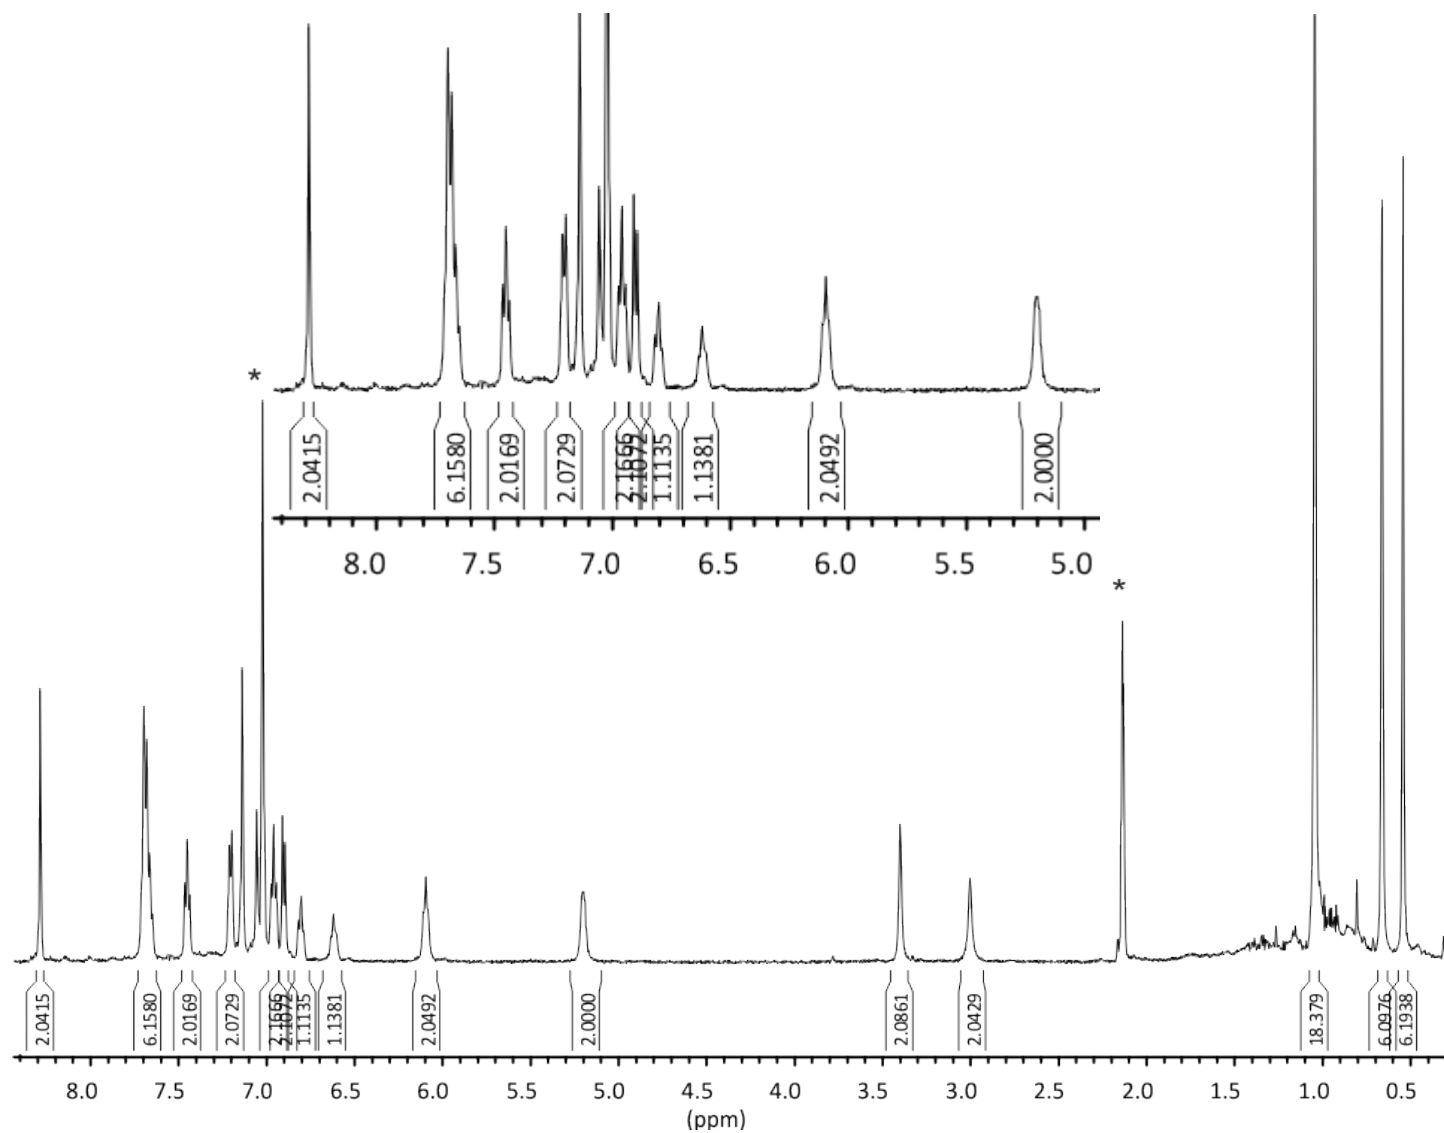

**Figure S1.** <sup>1</sup>H NMR spectrum (500 MHz, toluene-*d*<sub>8</sub>, 25 °C) of complex {ONO<sup>SiMe<sub>2</sub>tBu</sup>}Ti(CH<sub>2</sub>Ph)(*η*<sup>6</sup>-Ph)CH<sub>2</sub>B(C<sub>6</sub>F<sub>5</sub>)<sub>3</sub> (**2-Ti**) (\* stand for solvent peaks).

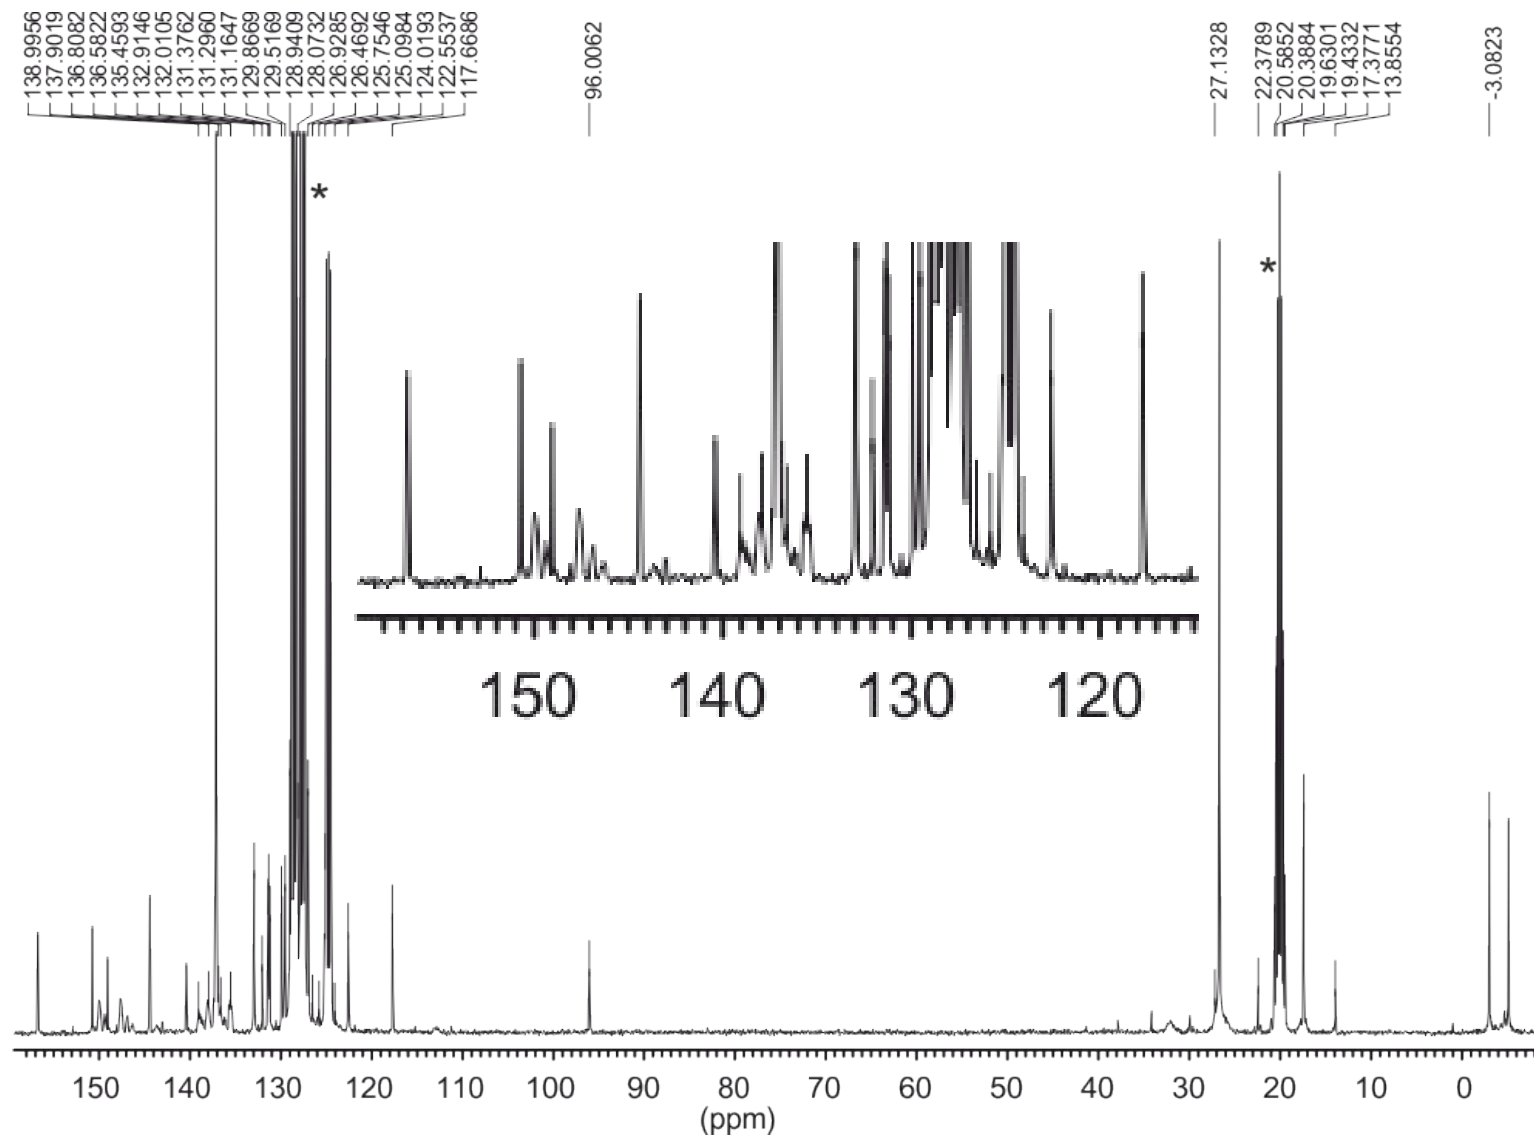

**Figure S2.**  $^{13}\text{C}\{^1\text{H}\}$  NMR spectrum (100 MHz, toluene- $d_8$ , 25 °C) of complex  $\{\text{ONO}^{\text{SiMe}_2\text{tBu}}\}_2\text{Ti}(\text{CH}_2\text{Ph})(\eta^6\text{-Ph})\text{CH}_2\text{B}(\text{C}_6\text{F}_5)_3$  (**2-Ti**) (\* stand for solvent peaks).

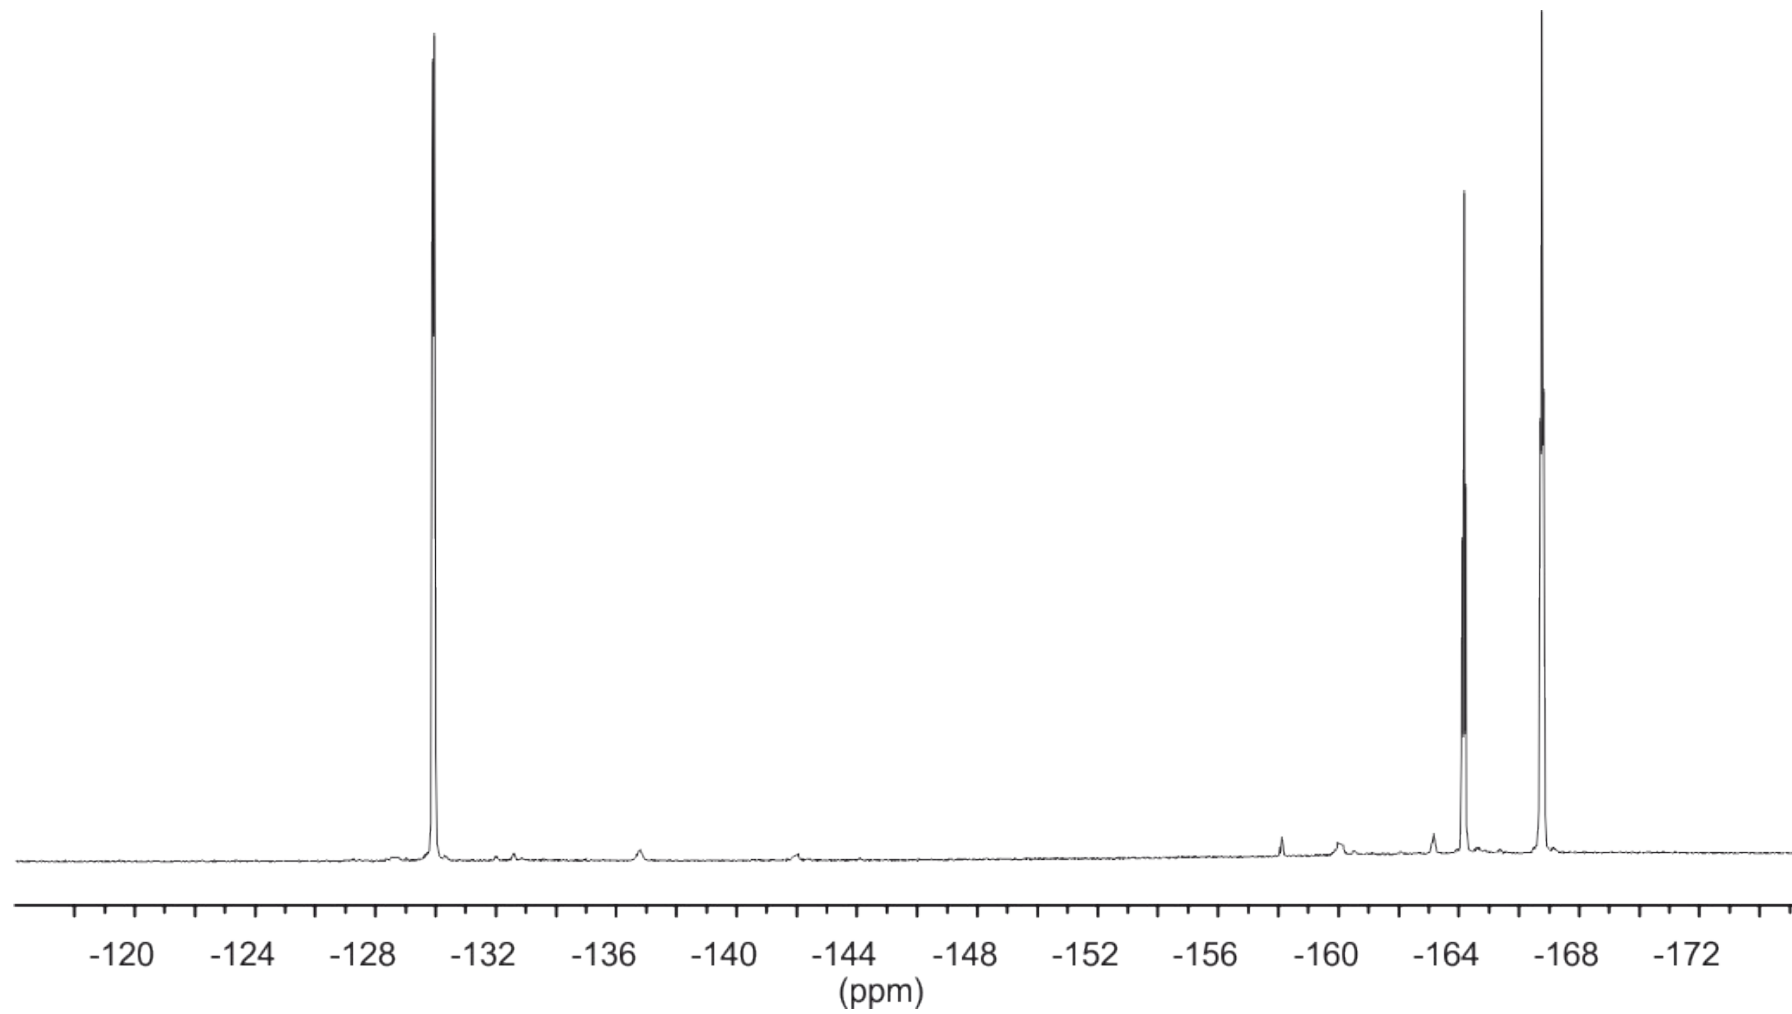

**Figure S3.**  $^{19}\text{F}\{^1\text{H}\}$  NMR spectrum (376 MHz, toluene- $d_8$ , 25 °C) of complex  $\{\text{ONO}^{\text{SiMe}_2\text{tBu}}\}\text{Ti}(\text{CH}_2\text{Ph})(\eta^6\text{-Ph})\text{CH}_2\text{B}(\text{C}_6\text{F}_5)_3$  (**2-Ti**).

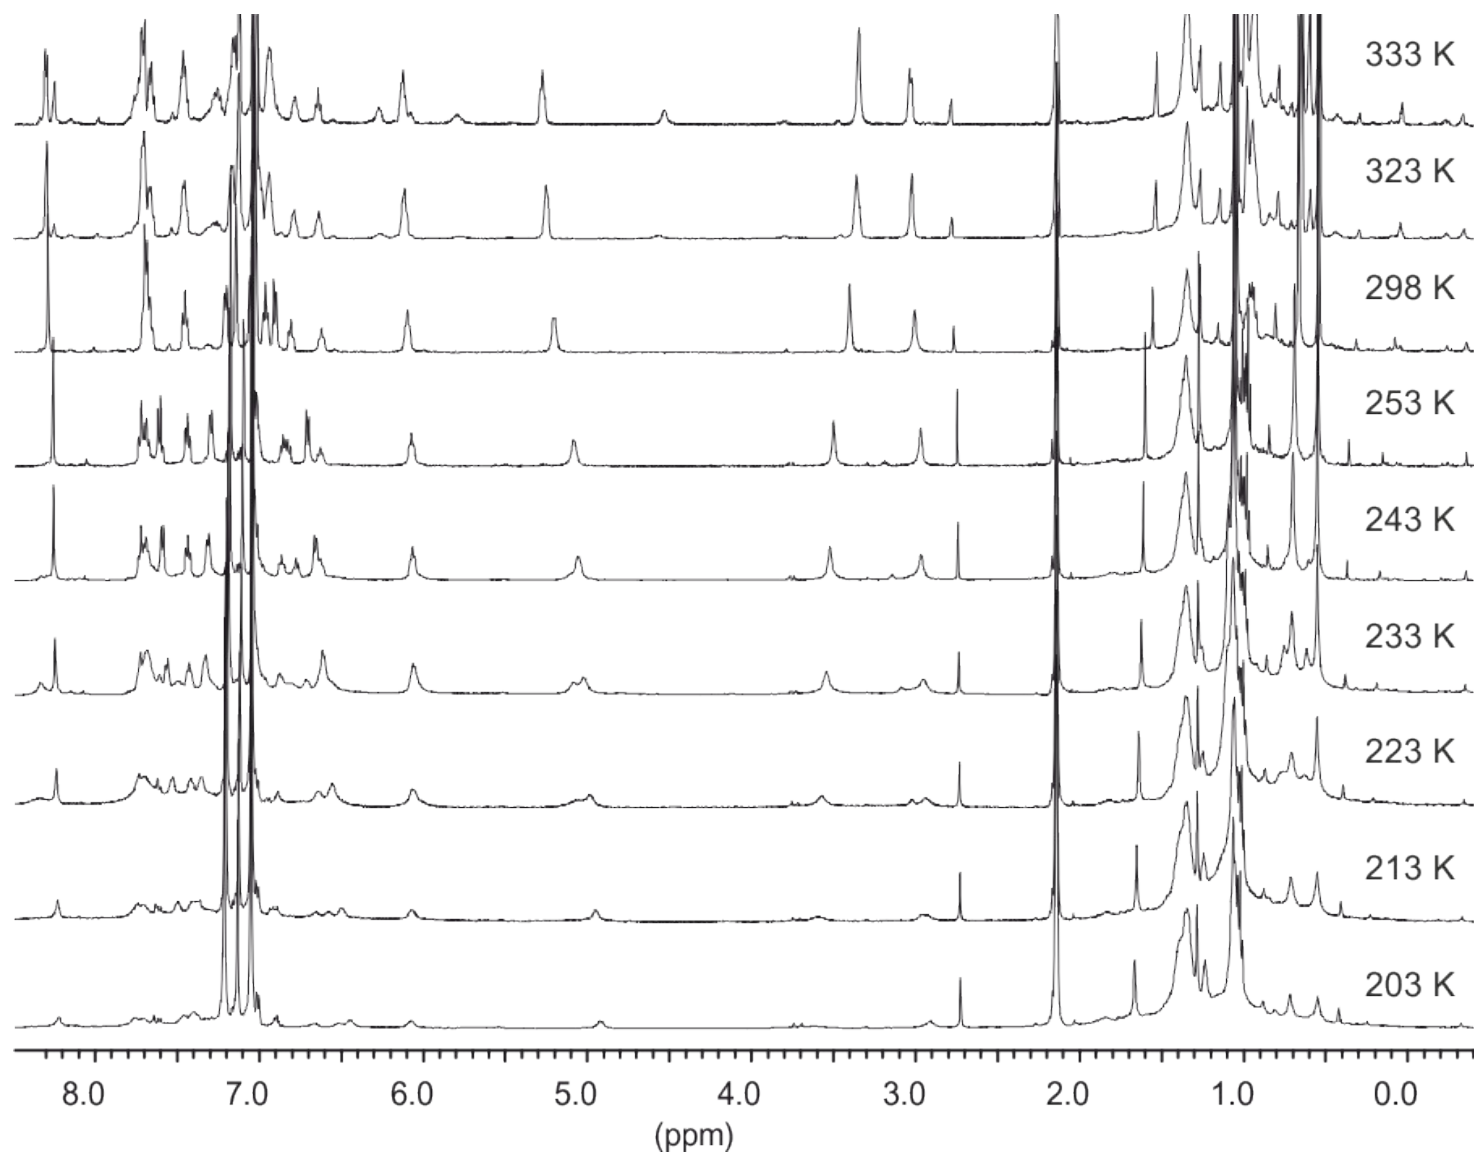

**Figure S4.** Stack plot of <sup>1</sup>H NMR spectra (500 MHz, toluene-*d*<sub>8</sub>) of complex {ONO<sup>SiMe<sub>2</sub>tBu</sup>}Ti(CH<sub>2</sub>Ph)( $\eta^6$ -Ph)CH<sub>2</sub>B(C<sub>6</sub>F<sub>5</sub>)<sub>3</sub> (**2-Ti**).

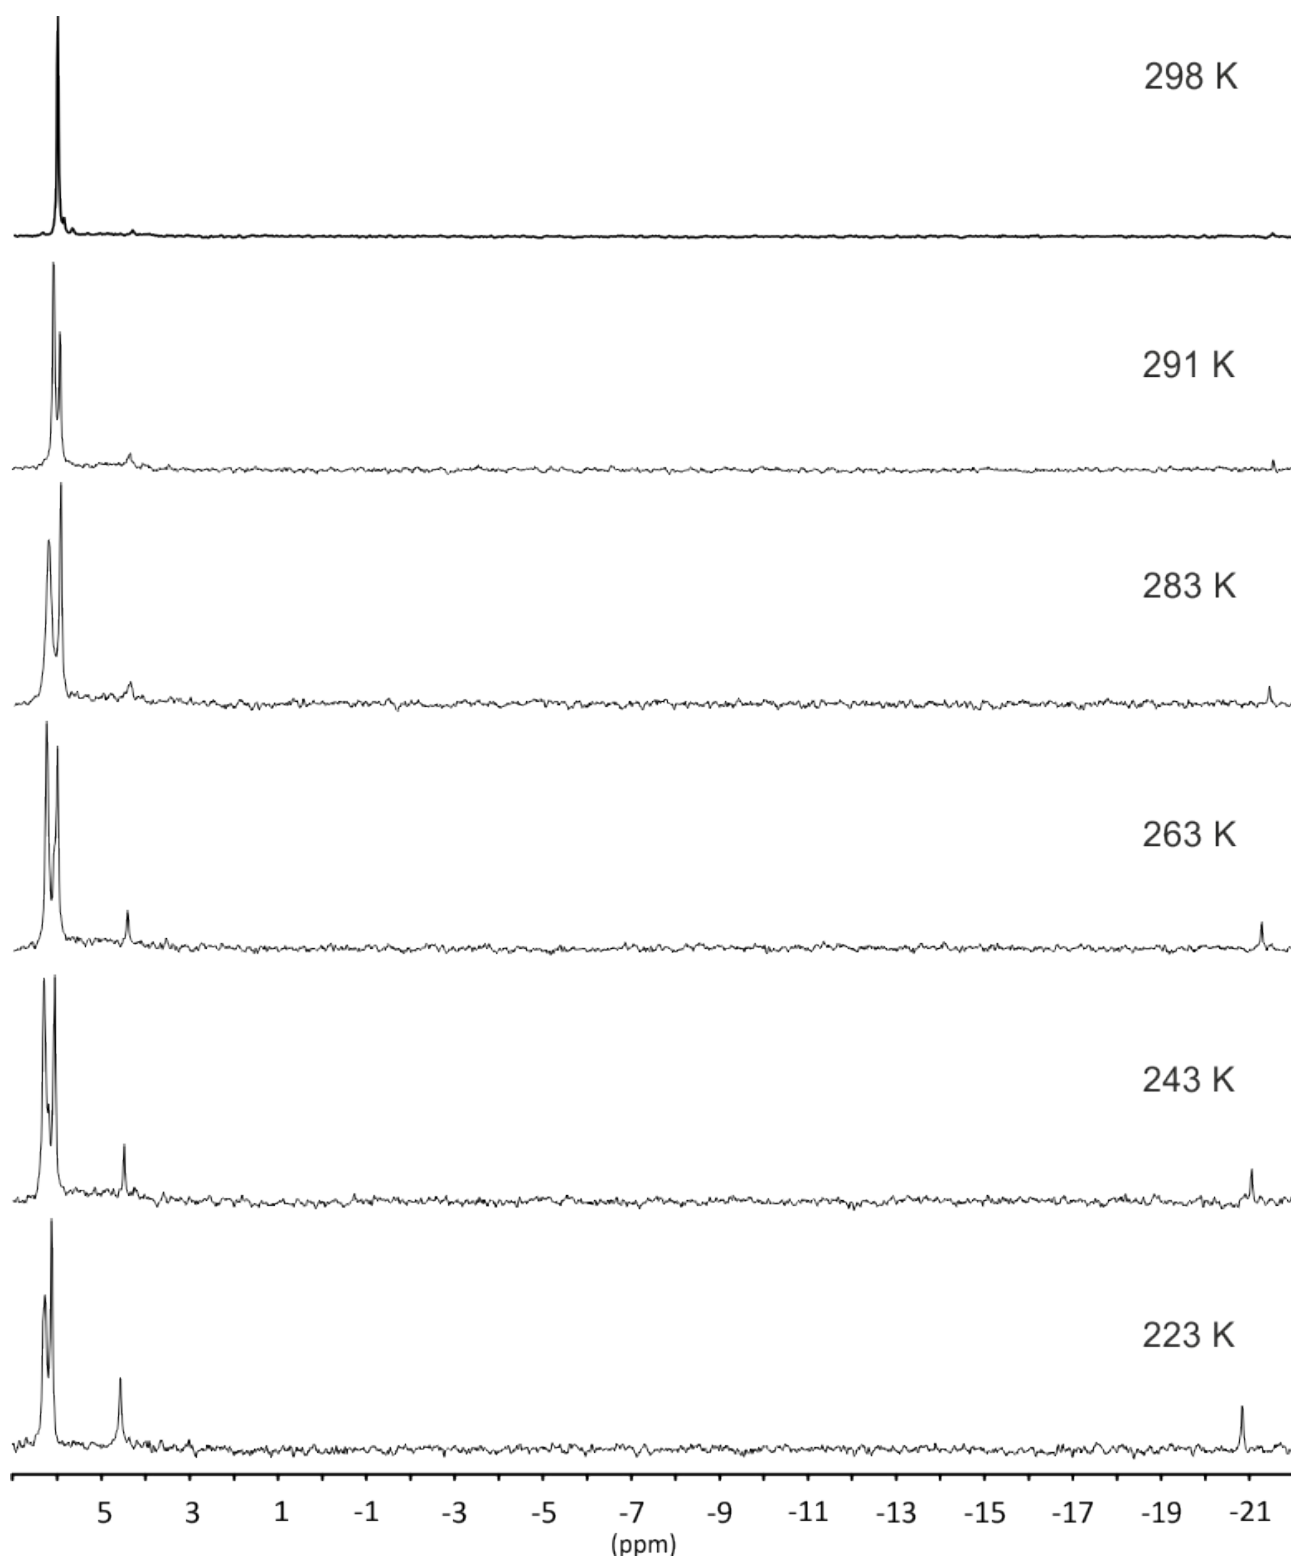

**Figure S5.** Stack plot of  $^{29}\text{Si}\{^1\text{H}\}$  NMR spectra (79.5 MHz,  $\text{toluene-}d_8$ ) of complex  $\{\text{ONOSiMe}_2\text{tBu}\}\text{Ti}(\text{CH}_2\text{Ph})(\eta^6\text{-Ph})\text{CH}_2\text{B}(\text{C}_6\text{F}_5)_3$  (**2-Ti**).

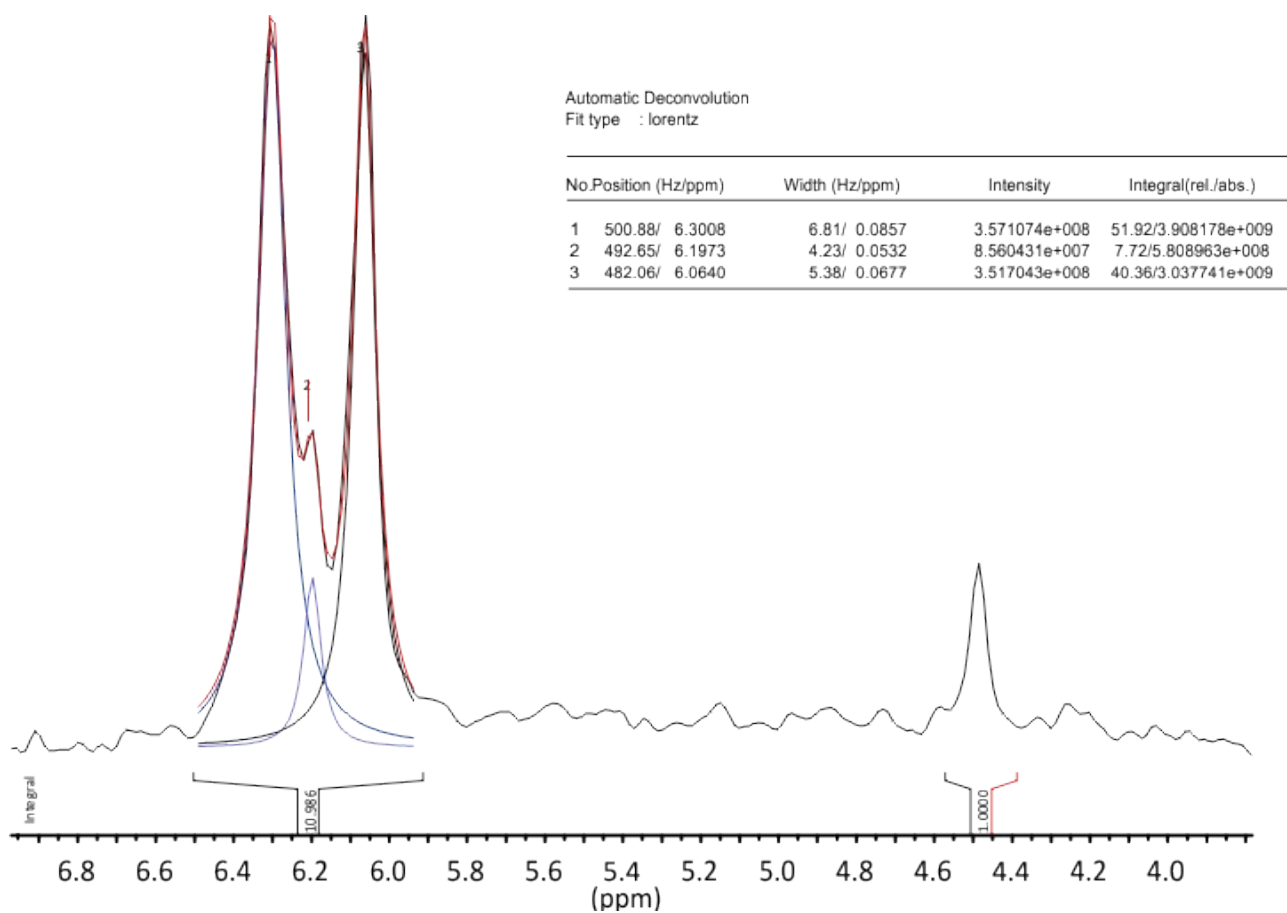

**Figure S6.** Result of deconvolution of  $^{29}\text{Si}\{^1\text{H}\}$  NMR spectrum (79.5 MHz, toluene- $d_8$ ,  $-30\text{ }^\circ\text{C}$ ) of complex  $\{\text{ONO}^{\text{SiMe}_2\text{tBu}}\}\text{Ti}(\text{CH}_2\text{Ph})(\eta^6\text{-Ph})\text{CH}_2\text{B}(\text{C}_6\text{F}_5)_3$  (**2-Ti**).

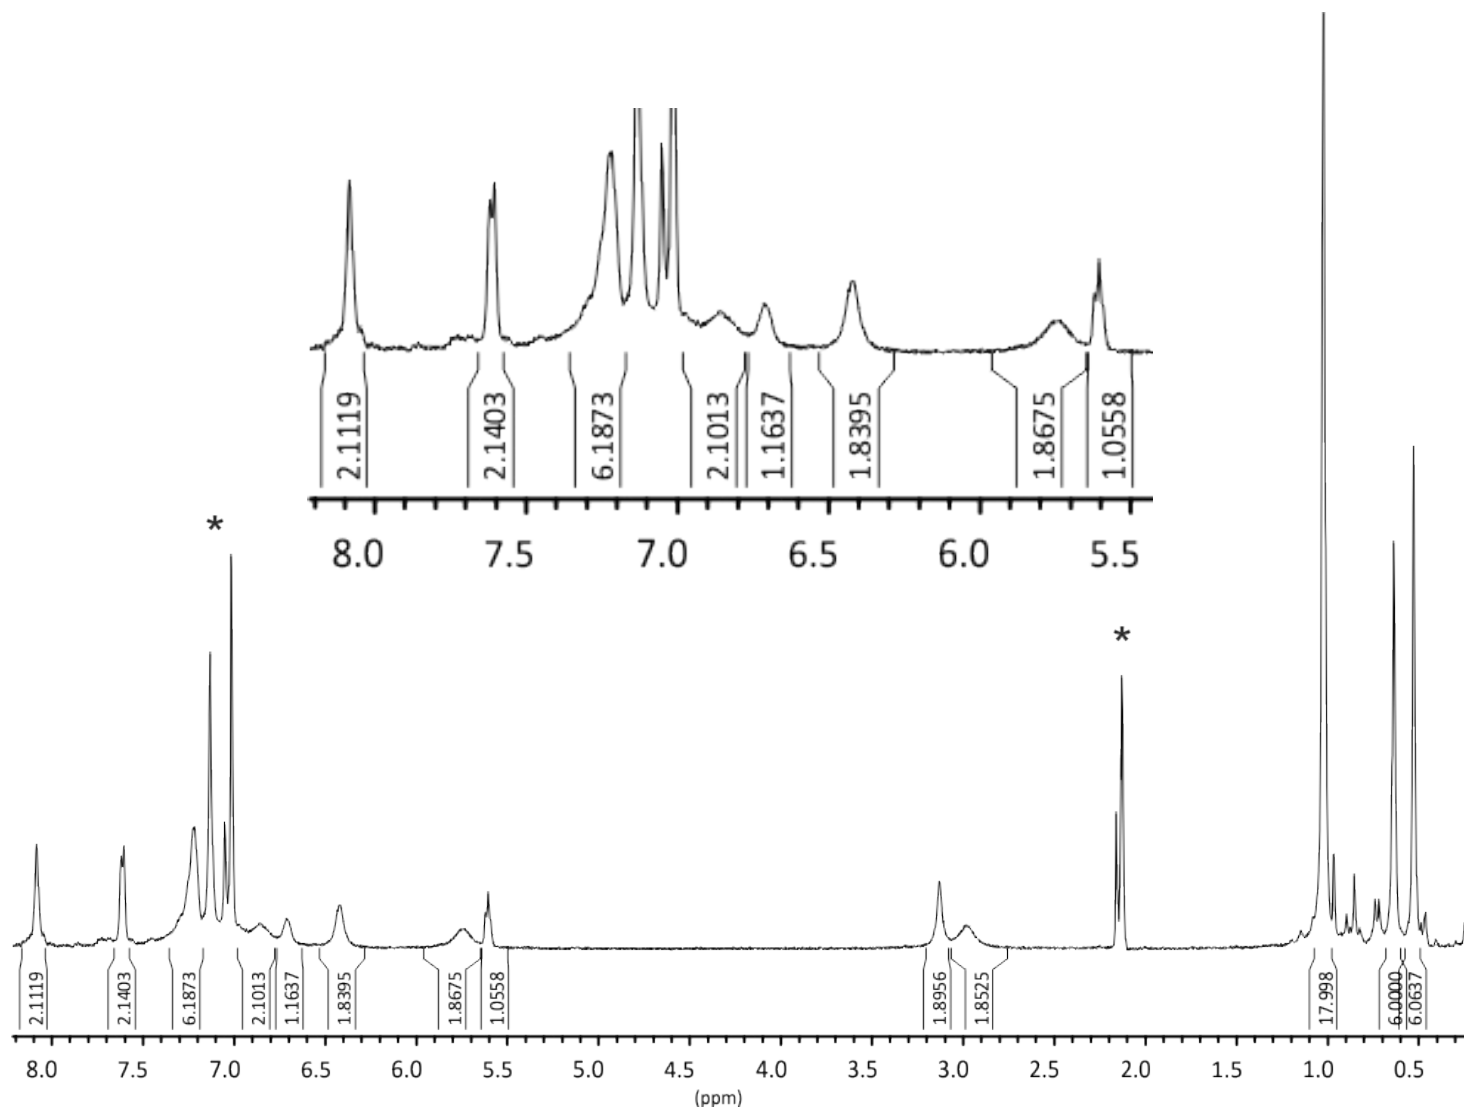

**Figure S7.**  $^1\text{H}$  NMR spectrum (500 MHz,  $\text{toluene-}d_8$ ,  $25\text{ }^\circ\text{C}$ ) of complex  $\{\text{ONO}^{\text{SiMe}_2\text{tBu}}\}\text{Zr}(\text{CH}_2\text{Ph})(\eta^6\text{-Ph})\text{CH}_2\text{B}(\text{C}_6\text{F}_5)_3$  (**2-Zr**) (\* stand for solvent peaks).



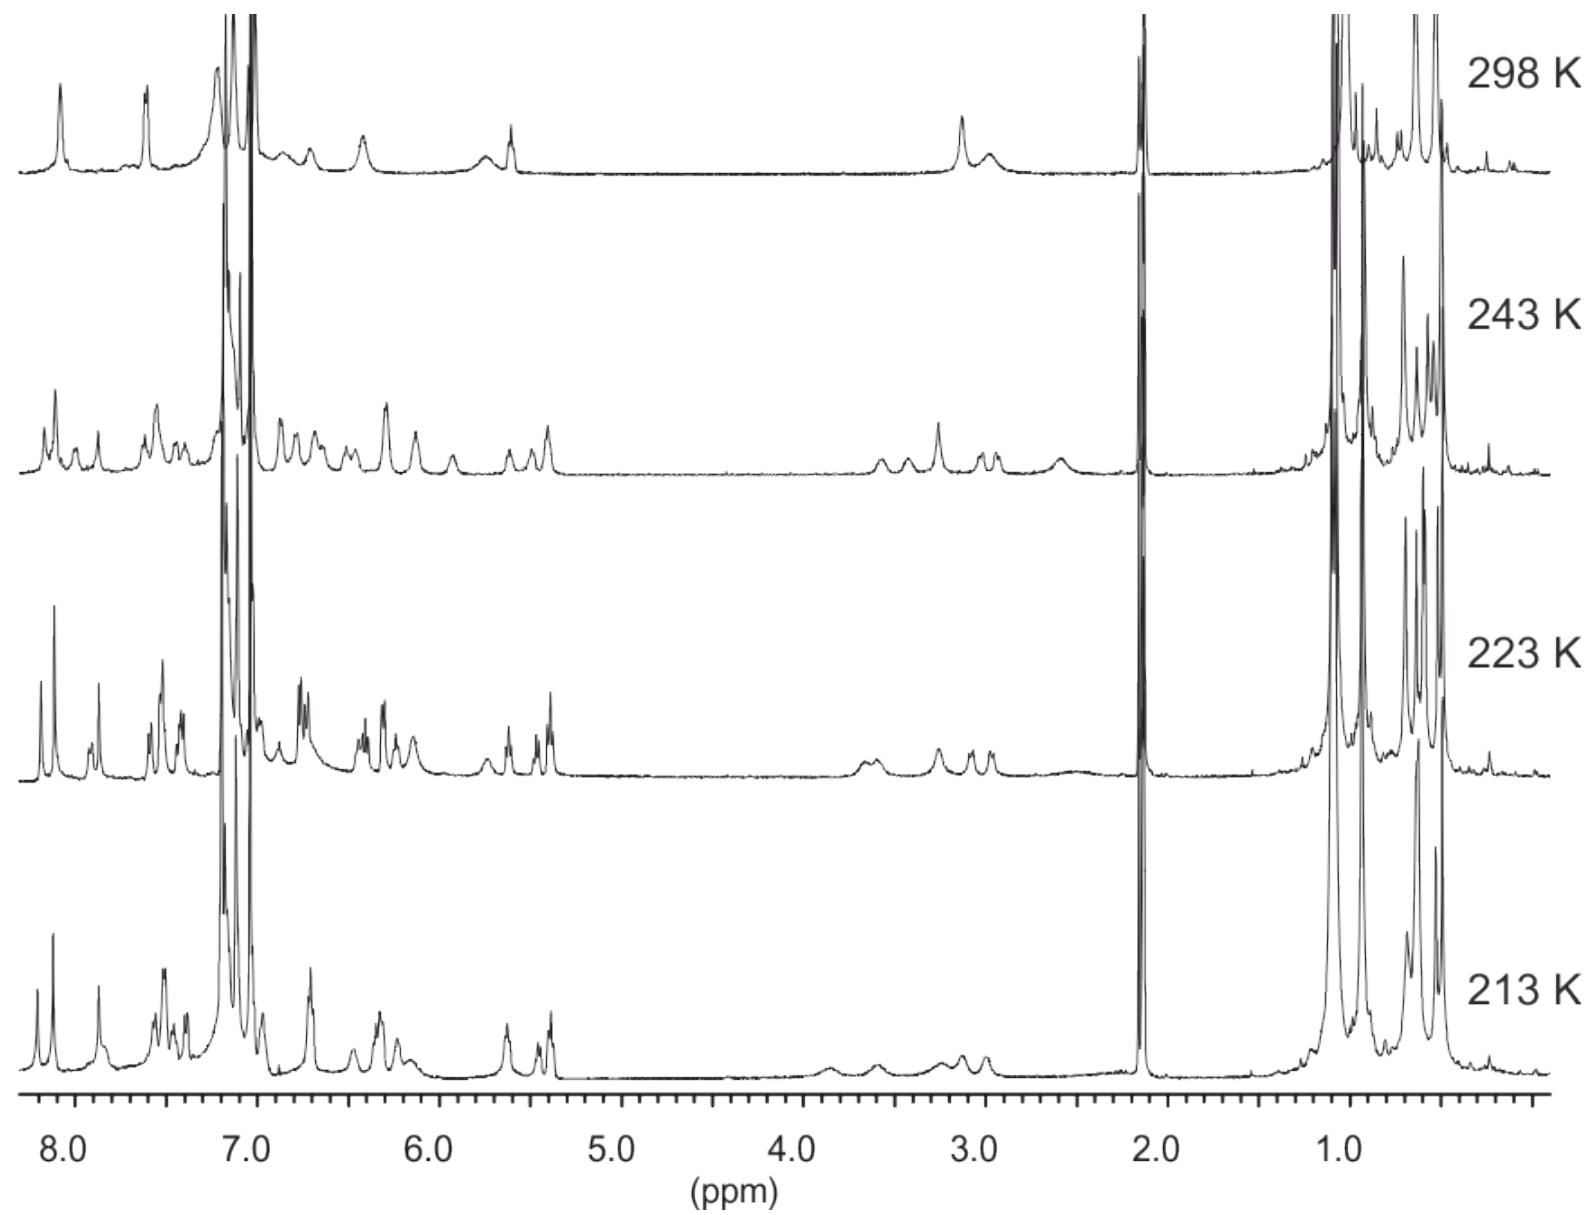

**Figure S8.** Stack plot of  $^1\text{H}$  NMR spectra (500 MHz,  $\text{toluene-}d_8$ ) of complex  $\{\text{ONO}^{\text{SiMe}_2\text{tBu}}\}\text{Zr}(\text{CH}_2\text{Ph})(\eta^6\text{-Ph})\text{CH}_2\text{B}(\text{C}_6\text{F}_5)_3$  (**2-Zr**).

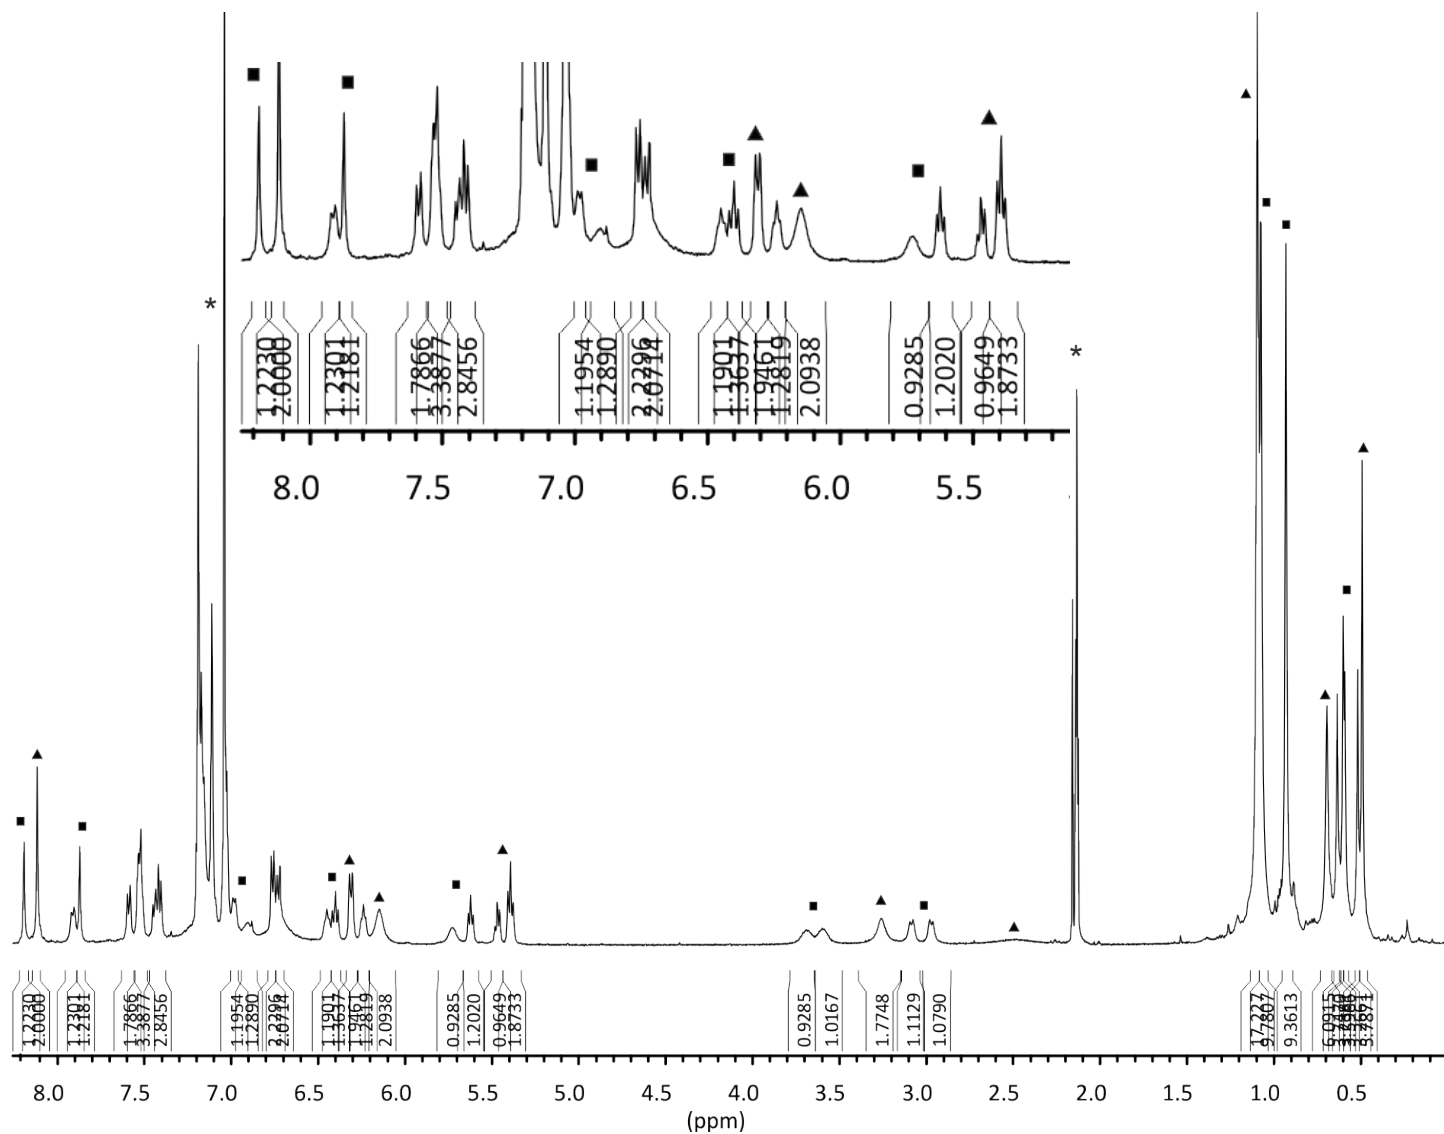

**Figure S9.** <sup>1</sup>H NMR spectrum (500 MHz, toluene-*d*<sub>8</sub>, -50 °C) of complex  $\{\text{ONO}^{\text{SiMe}_2\text{tBu}}\}\text{Zr}(\text{CH}_2\text{Ph})(\eta^6\text{-Ph})\text{CH}_2\text{B}(\text{C}_6\text{F}_5)_3$  (**2-Zr**) (\* stand for solvent peaks).

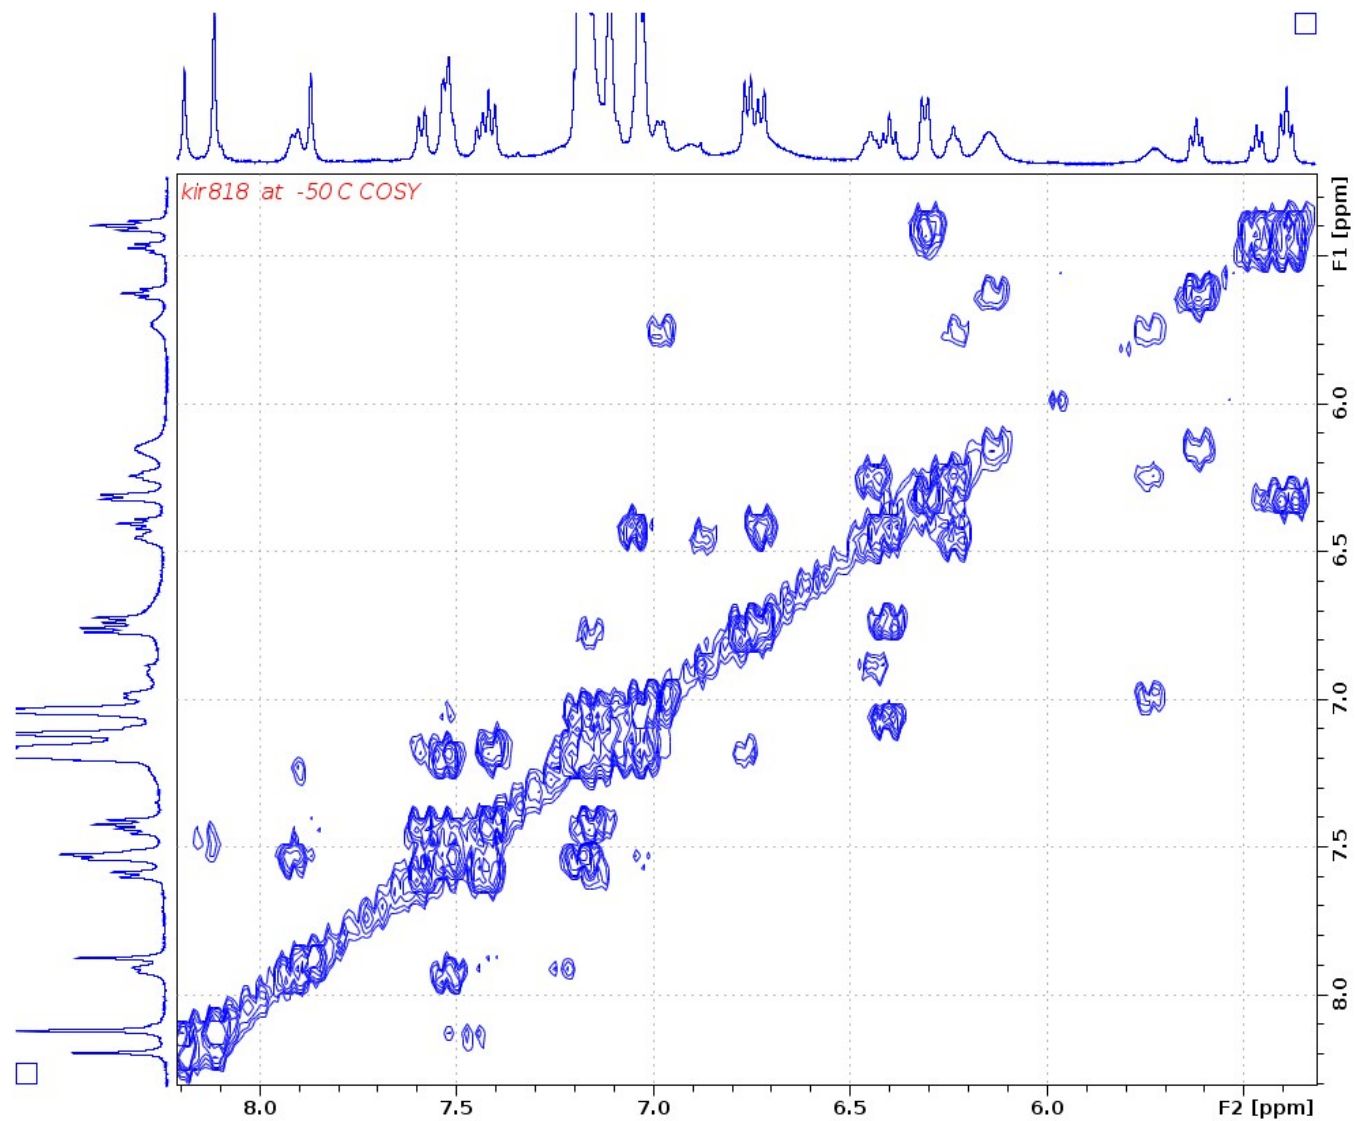

**Figure S10.** Low-field portion of the <sup>1</sup>H–<sup>1</sup>H COSY NMR spectrum (500 MHz, toluene-*d*<sub>8</sub>, –50 °C) of complex {ONO<sup>SiMe<sub>2</sub>tBu</sup>}Zr(CH<sub>2</sub>Ph)( $\eta^6$ -Ph)CH<sub>2</sub>B(C<sub>6</sub>F<sub>5</sub>)<sub>3</sub> (**2-Zr**).

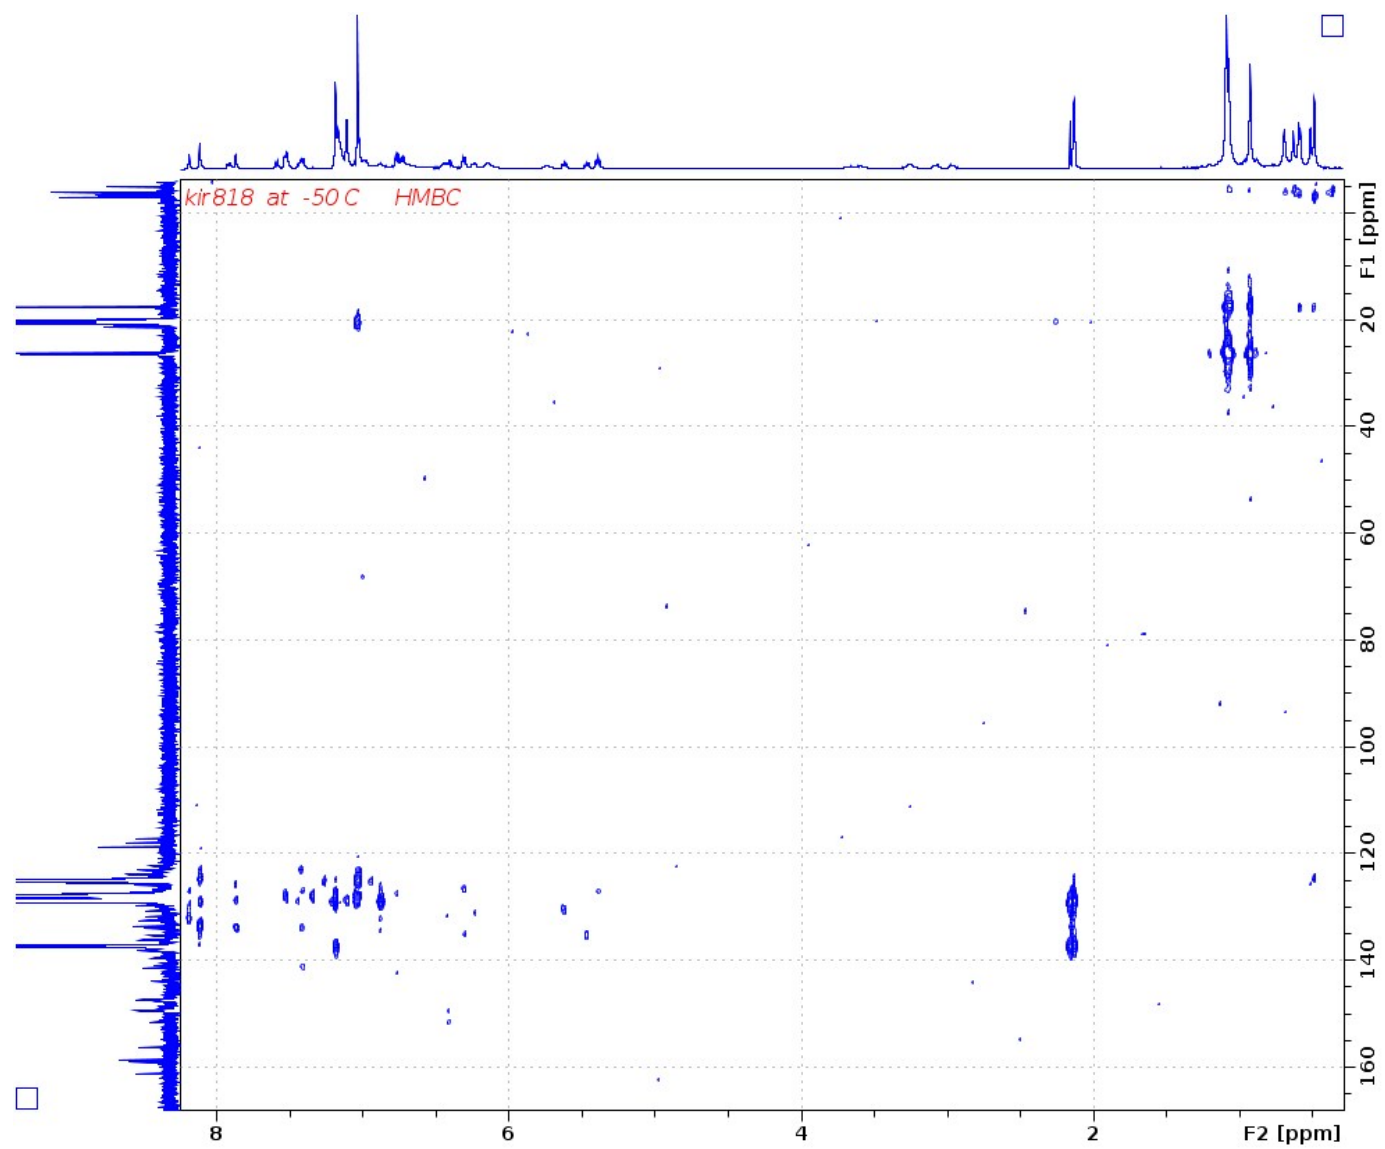

**Figure S11.** <sup>1</sup>H-<sup>13</sup>C HMQC NMR spectrum (500 MHz, toluene-*d*<sub>8</sub>, -50 °C) of complex {ONO<sup>SiMe<sub>2</sub>tBu</sup>}Zr(CH<sub>2</sub>Ph)(*η*<sup>6</sup>-Ph)CH<sub>2</sub>B(C<sub>6</sub>F<sub>5</sub>)<sub>3</sub> (**2-Zr**).

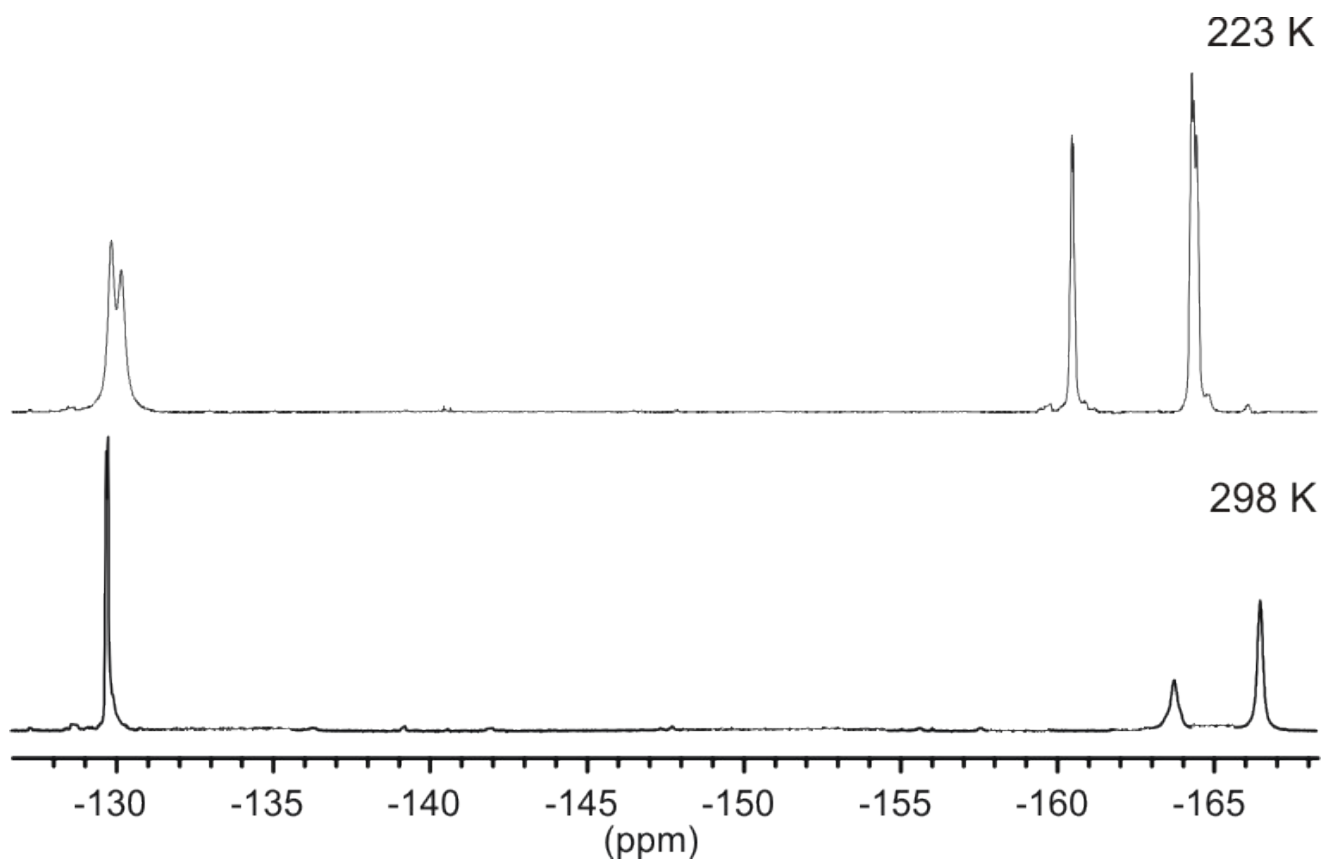

**Figure S12.** Stack plot of  $^{19}\text{F}\{^1\text{H}\}$  NMR spectra (376 MHz,  $\text{toluene-}d_8$ ) of complex  $\{\text{ONO}^{\text{SiMe}_2\text{tBu}}\}_2\text{Zr}(\text{CH}_2\text{Ph})(\eta^6\text{-Ph})\text{CH}_2\text{B}(\text{C}_6\text{F}_5)_3$  (**2-Zr**).

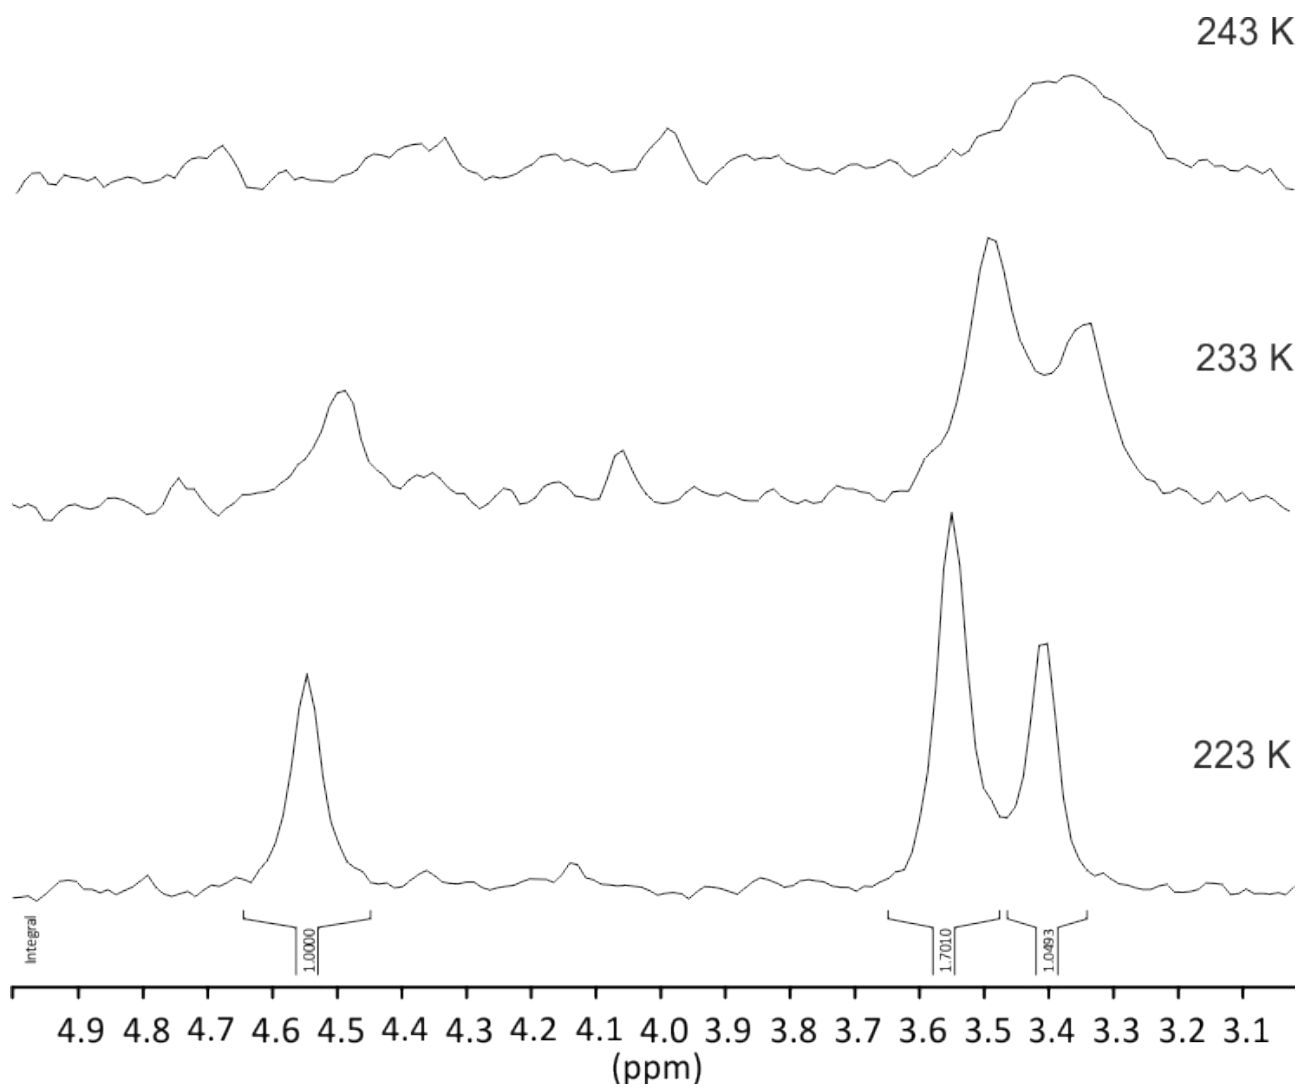

**Figure S13.** Stack plot of  $^{29}\text{Si}\{^1\text{H}\}$  NMR spectra (79.5 MHz, toluene- $d_8$ ) of complex  $\{\text{ONO}^{\text{SiMe}_2\text{tBu}}\}\text{Zr}(\text{CH}_2\text{Ph})(\eta^6\text{-Ph})\text{CH}_2\text{B}(\text{C}_6\text{F}_5)_3$  (**2-Zr**).

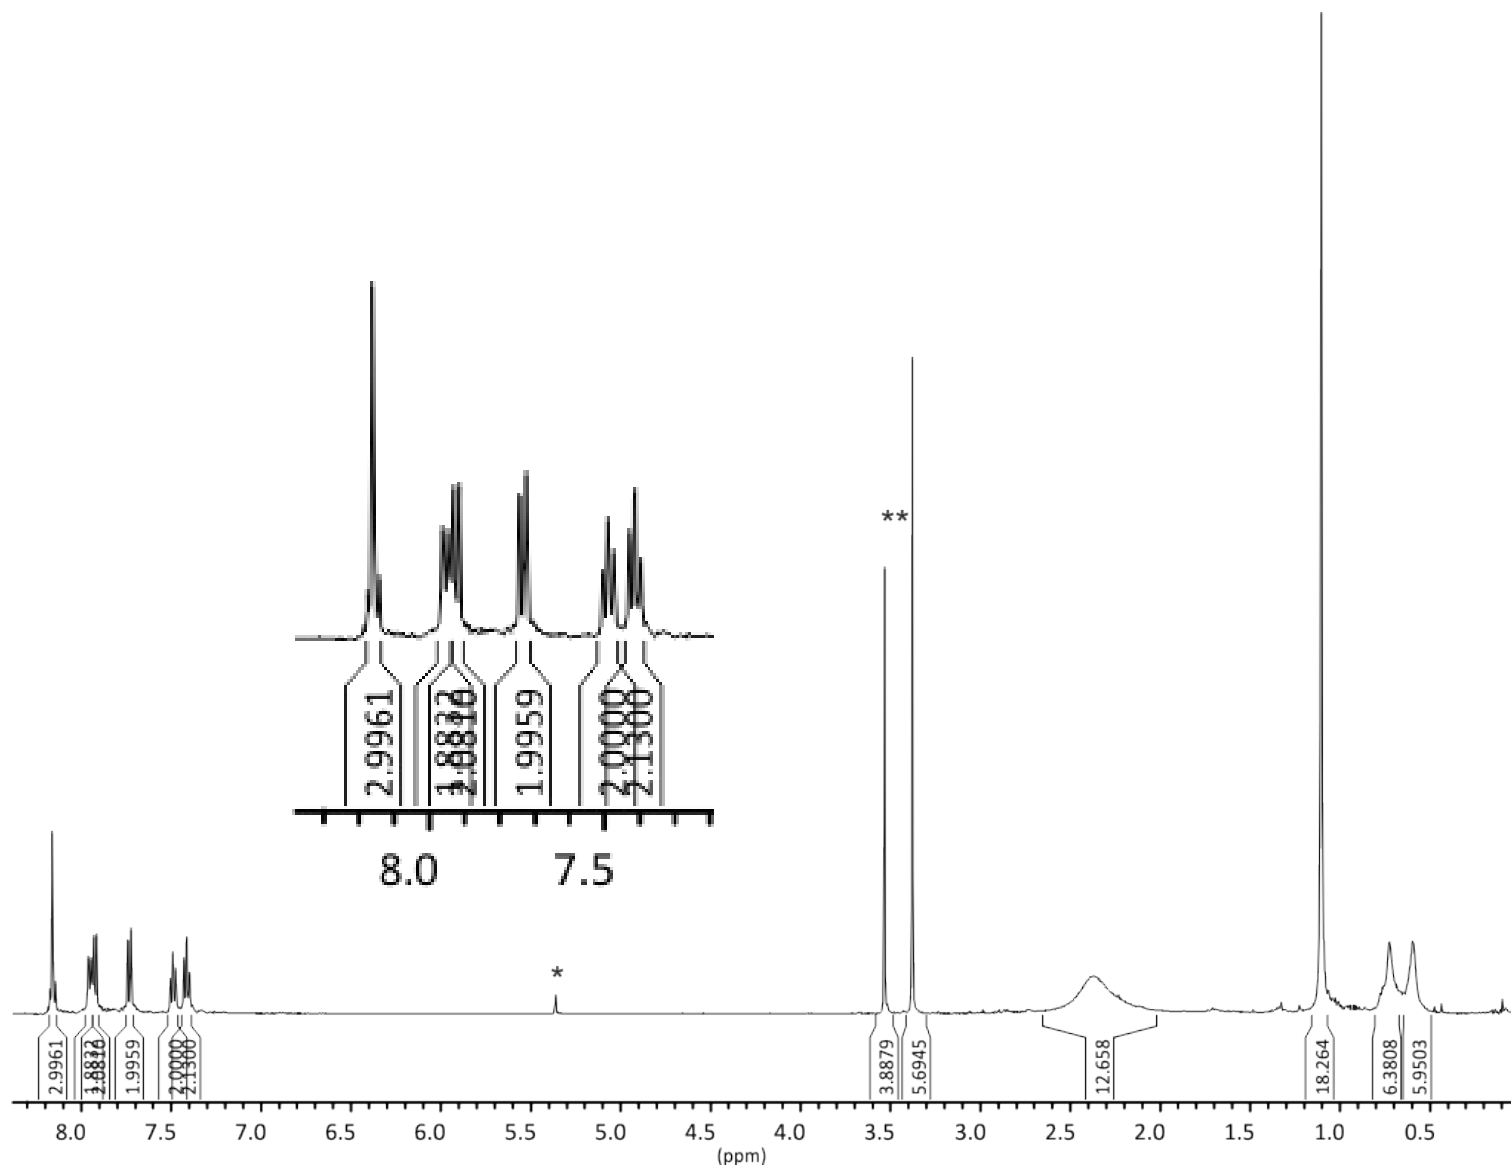

**Figure S14.** <sup>1</sup>H NMR spectrum (500 MHz, CD<sub>2</sub>Cl<sub>2</sub>, 25 °C) of complex {ONO<sup>SiMe<sub>2</sub>tBu</sup>}ZrCl<sub>2</sub>(HNMe<sub>2</sub>) (**3**) (\* and \*\* stand for solvent and DME peaks, respectively).

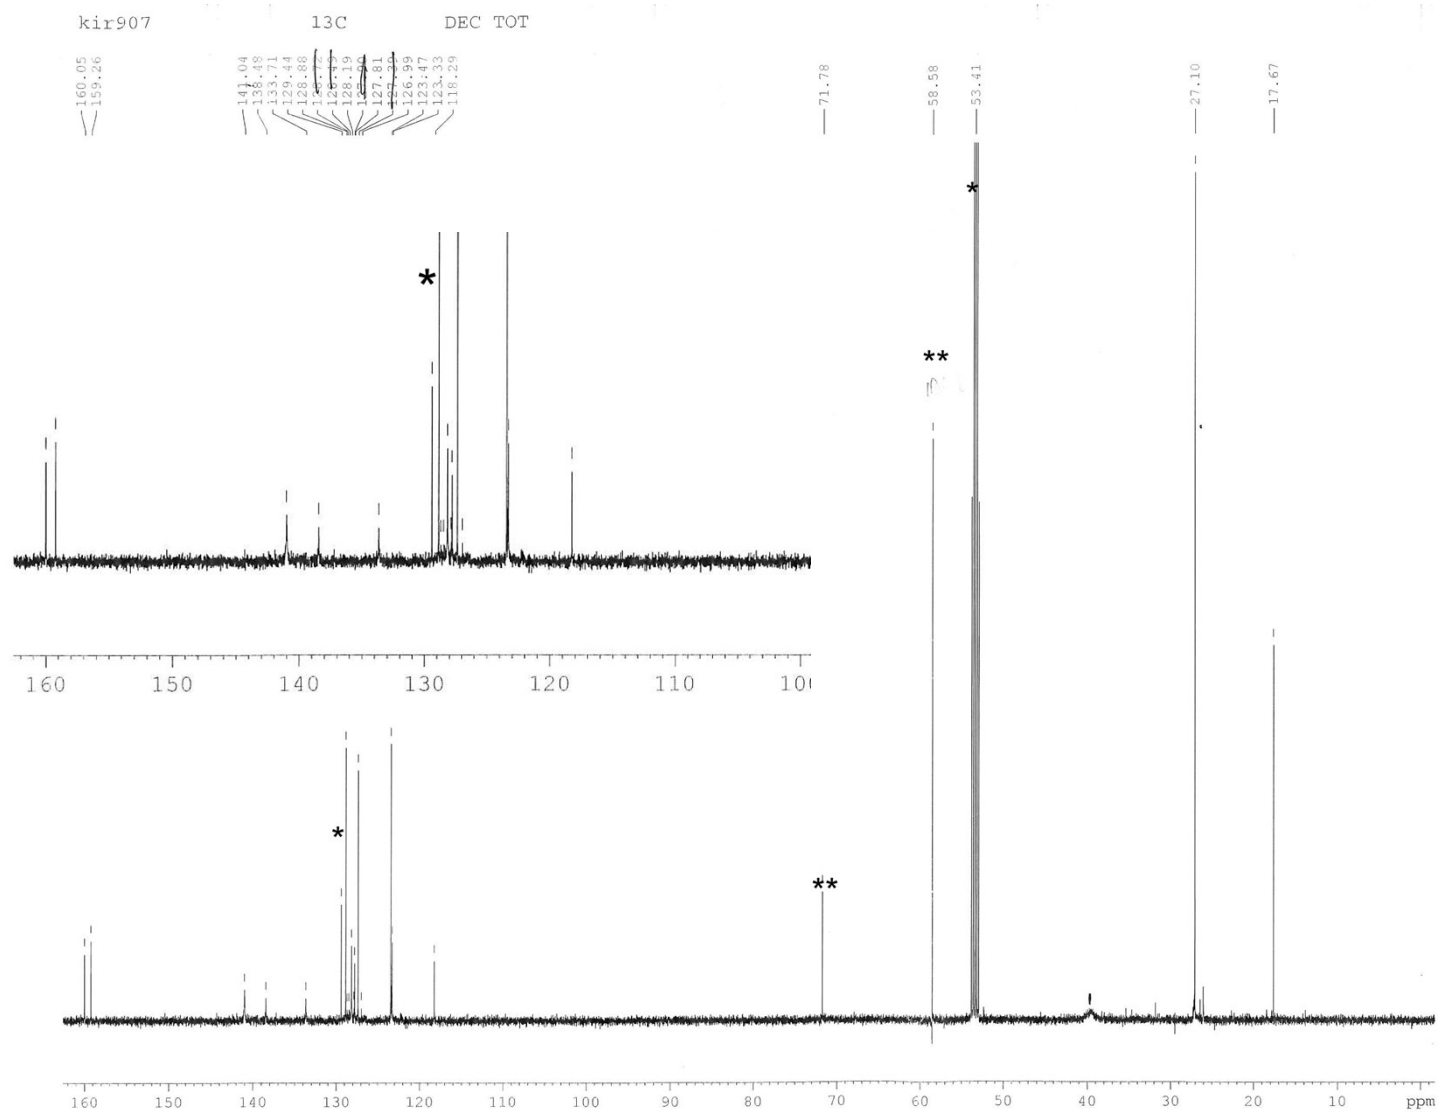

**Figure S15.**  $^{13}\text{C}\{^1\text{H}\}$  NMR spectrum (125 MHz,  $\text{CD}_2\text{Cl}_2$ , 25 °C) of complex  $\{\text{ONO}^{\text{SiMe}_2\text{tBu}}\}_2\text{ZrCl}_2(\text{HNMe}_2)$  (**3**) (\* and \*\* stand for solvent and residual DME peaks, respectively).



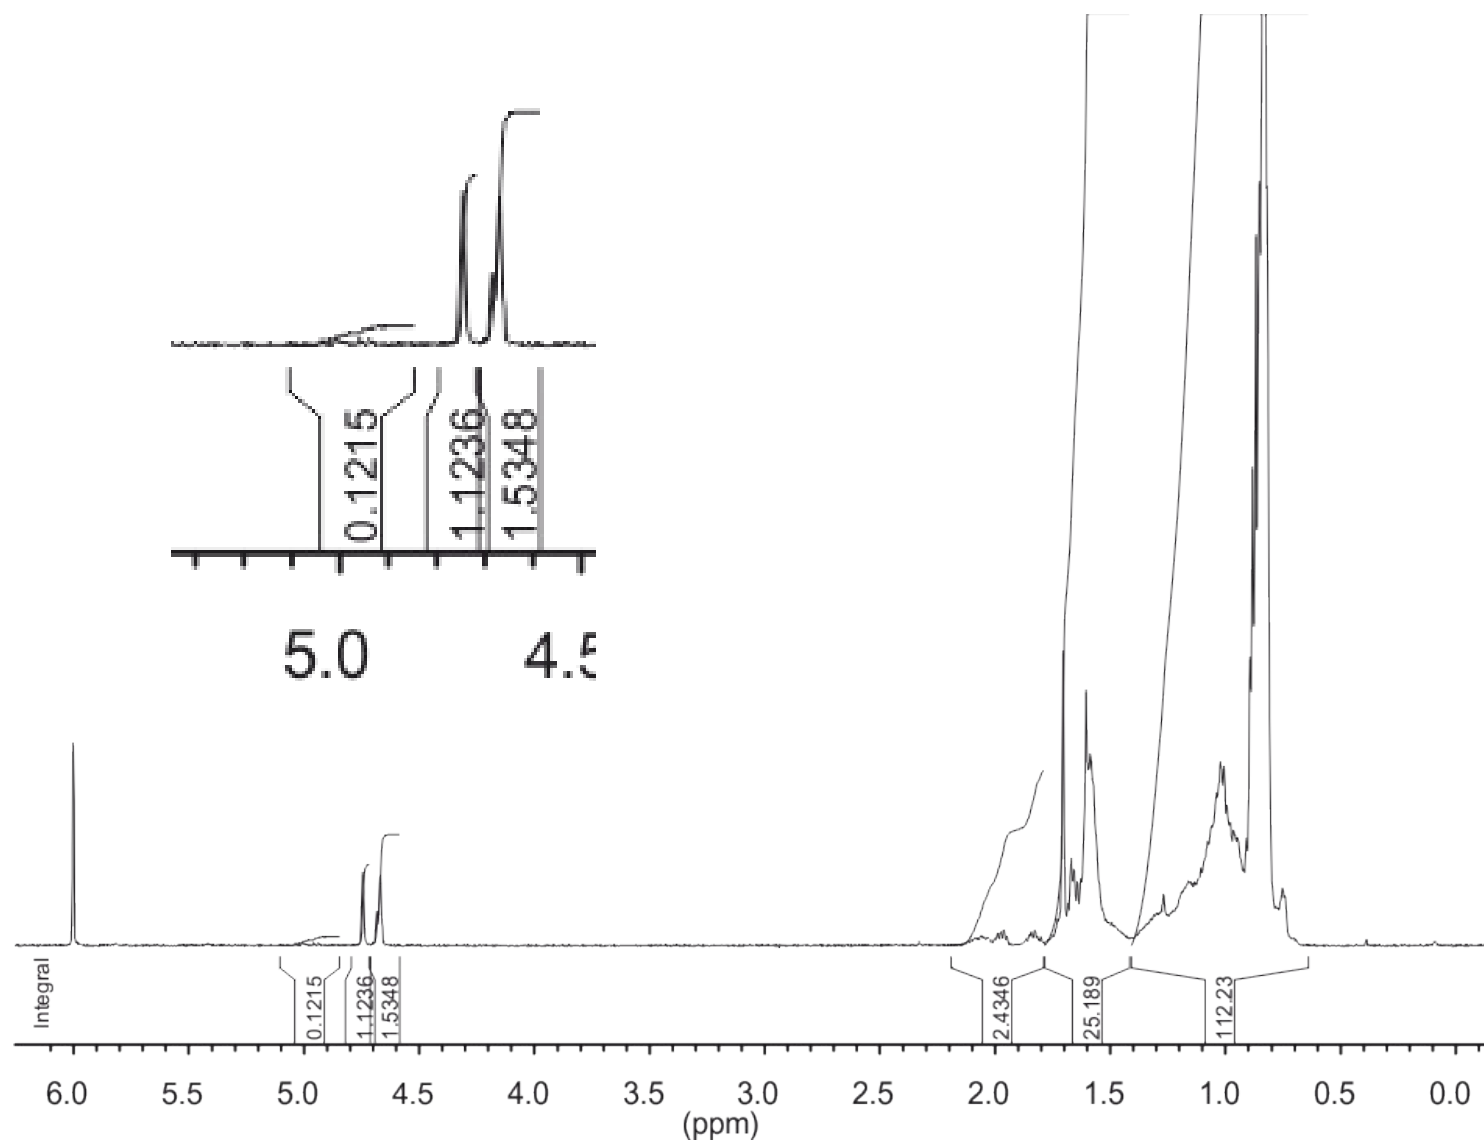

**Figure S16.**  $^1\text{H}$  NMR spectrum (500 MHz,  $\text{C}_2\text{D}_2\text{Cl}_4$ , 25  $^\circ\text{C}$ ) of oligopropylene sample prepared with 3/MAO system (Table S2, entry 2).

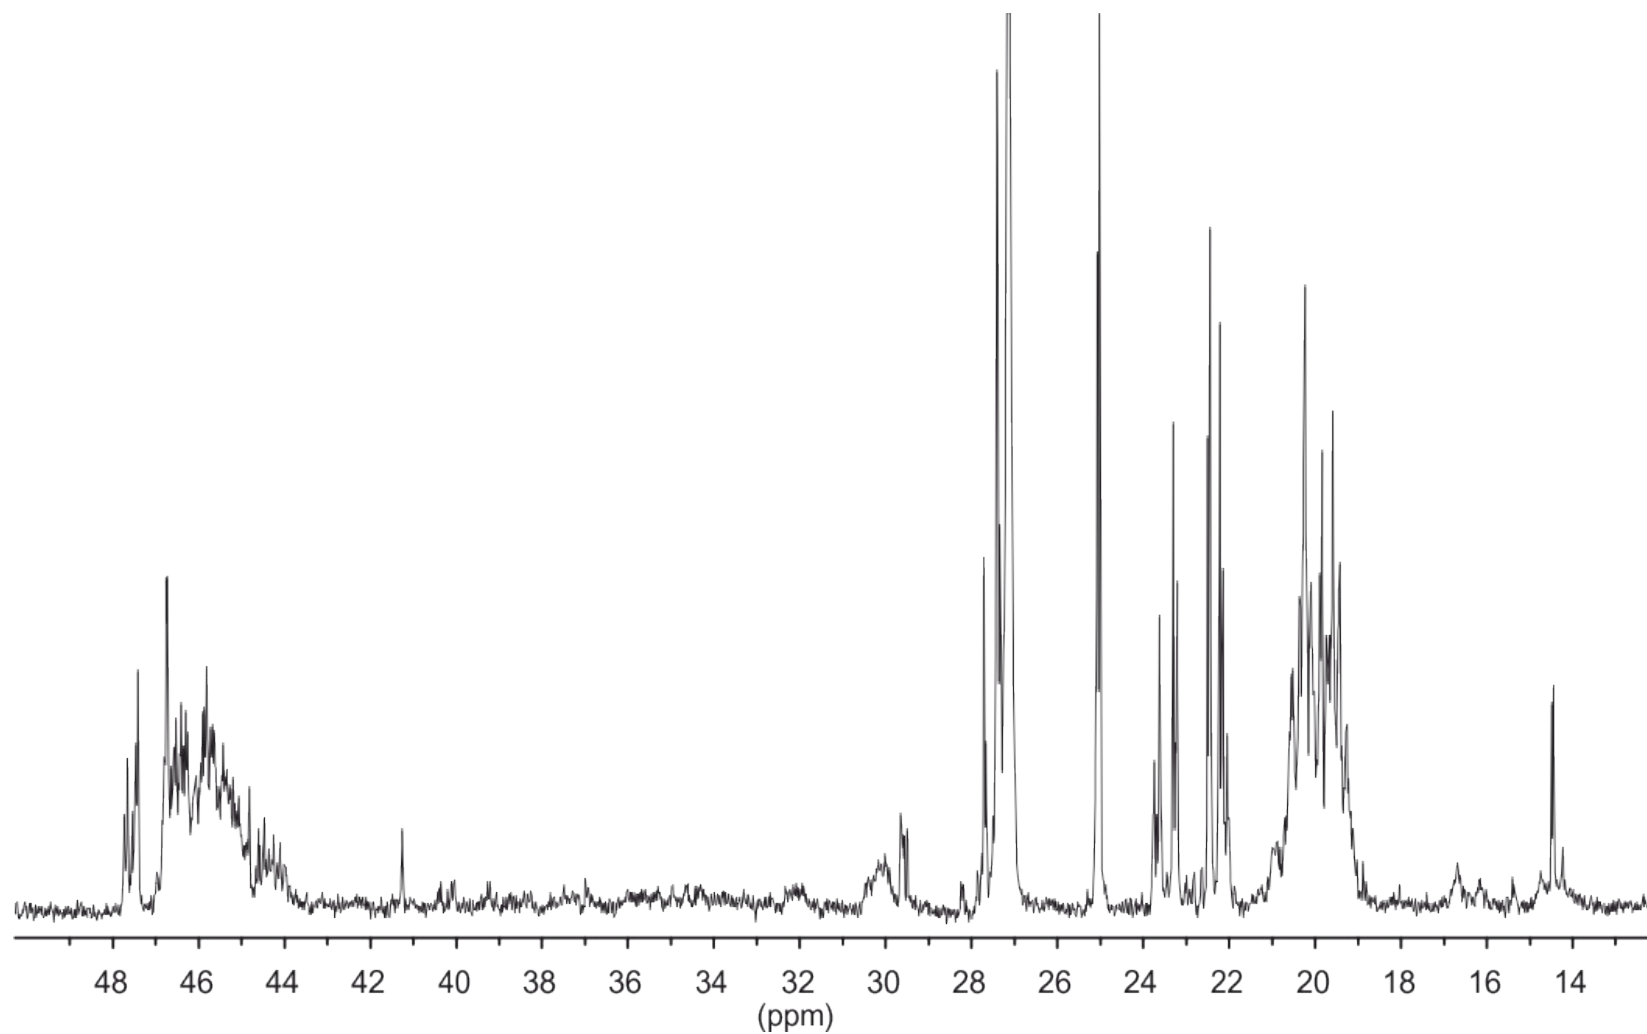

**Figure S17.** Aliphatic portion of the  $^{13}\text{C}\{^1\text{H}\}$  NMR spectrum (125 MHz,  $\text{C}_2\text{D}_2\text{Cl}_4$ , 25 °C) of oligopropylene sample prepared with **3**/MAO system (Table S2, entry 2).

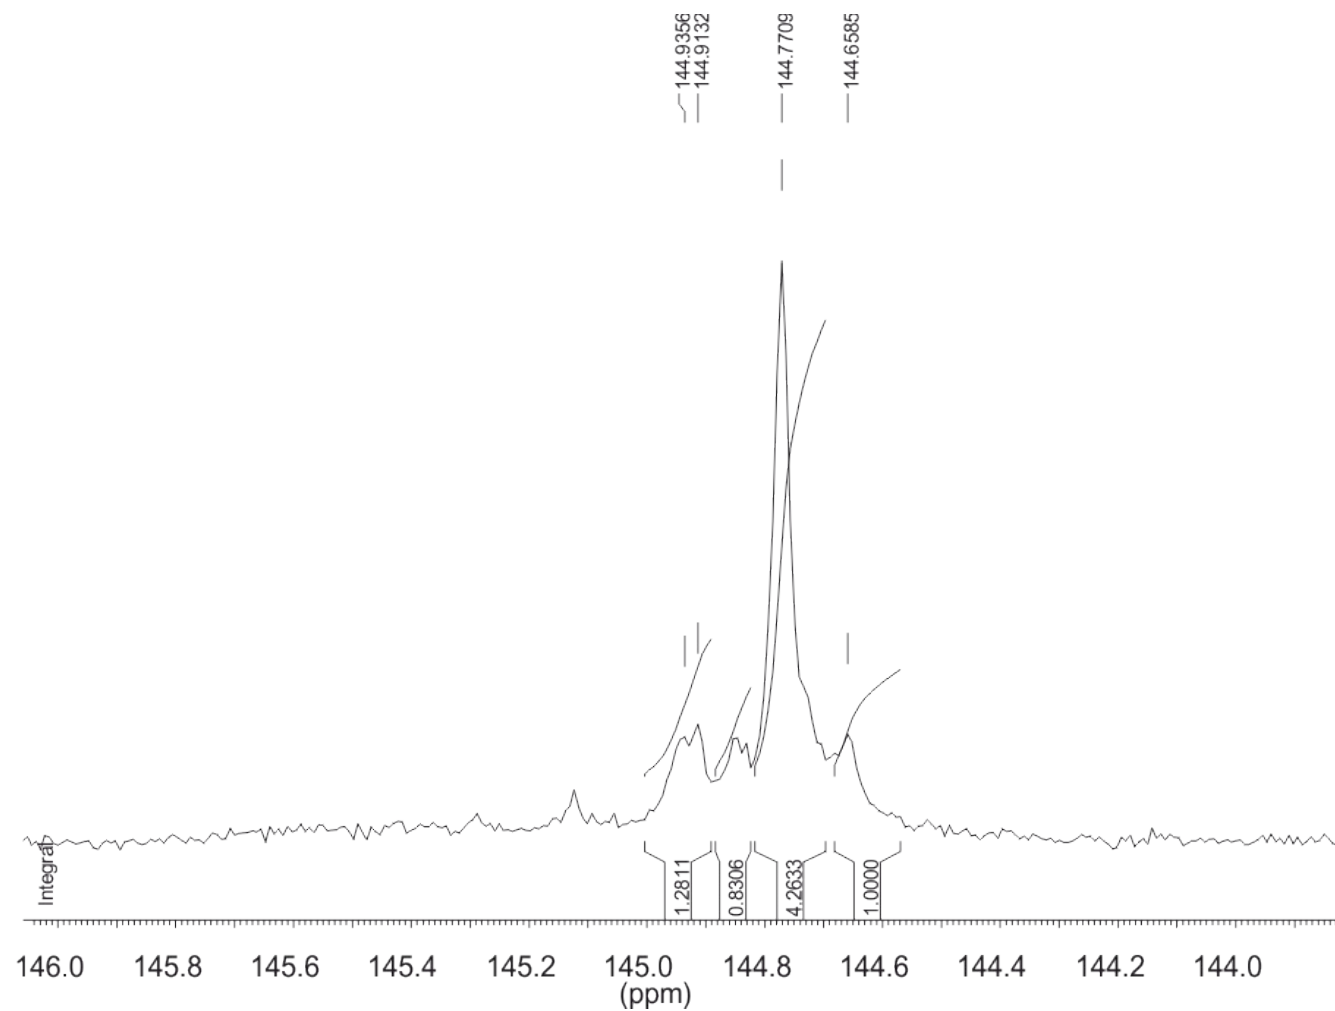

**Figure S18.** The *ipso*-carbon region of the  $^{13}\text{C}\{^1\text{H}\}$  NMR spectrum (125 MHz,  $\text{C}_2\text{D}_2\text{Cl}_4$ , 25 °C) of polystyrene sample prepared with **3**/MAO system (Table S3, entry 19).

**Table S1.** Summary of Crystal and Refinement Data for Compounds **2-Zr** and **3**.

|                                          | <b>2-Zr</b>                                                                         | <b>3</b>                                                                                                                               |
|------------------------------------------|-------------------------------------------------------------------------------------|----------------------------------------------------------------------------------------------------------------------------------------|
| Empirical formula                        | C <sub>69</sub> H <sub>57</sub> BF <sub>15</sub> NO <sub>2</sub> Si <sub>2</sub> Zr | 3(C <sub>39</sub> H <sub>50</sub> Cl <sub>2</sub> N <sub>2</sub> O <sub>2</sub> Si <sub>2</sub> Zr), 7(C <sub>6</sub> H <sub>6</sub> ) |
| Formula weight                           | 1375.37                                                                             | 2938.09                                                                                                                                |
| Temperature, K                           | 150                                                                                 | 150                                                                                                                                    |
| Wavelength, Å                            | 0.71073                                                                             | 0.71073                                                                                                                                |
| Crystal system                           | monoclinic                                                                          | triclinic                                                                                                                              |
| Space group                              | P 2 <sub>1</sub> /c                                                                 | P -1                                                                                                                                   |
| a, Å                                     | 16.3881(4)                                                                          | 18.8689(10)                                                                                                                            |
| b, Å                                     | 28.2501(7)                                                                          | 20.4867(11)                                                                                                                            |
| c, Å                                     | 18.8581(5)                                                                          | 22.9343(13)                                                                                                                            |
| α, deg                                   | 90                                                                                  | 69.667(2)                                                                                                                              |
| β, deg                                   | 115.6710(10)                                                                        | 75.579(2)                                                                                                                              |
| γ, deg                                   | 90                                                                                  | 70.528(2)                                                                                                                              |
| Volume, Å <sup>3</sup>                   | 7868.9(3)                                                                           | 7748.1(7)                                                                                                                              |
| Z                                        | 4                                                                                   | 2                                                                                                                                      |
| Density (calc.), Mg/m <sup>3</sup>       | 1.161                                                                               | 1.259                                                                                                                                  |
| Absorption coefficient, mm <sup>-1</sup> | 0.243                                                                               | 0.403                                                                                                                                  |
| Crystal size, mm <sup>3</sup>            | 0.35 x 0.22 x 0.15                                                                  | 0.41 x 0.28 x 0.06                                                                                                                     |
| Reflections collected                    | 121430                                                                              | 116649                                                                                                                                 |
| Independent reflections                  | 17983                                                                               | 34197                                                                                                                                  |
| Max. and min. transmission               | 0.964 , 0.847                                                                       | 0.976 , 0.851                                                                                                                          |
| Data / restraints / parameters           | 17983 / 0 / 830                                                                     | 34197 / 21 / 1459                                                                                                                      |
| Final R indices [I>2σ(I)]                | 0.0472                                                                              | 0.0643                                                                                                                                 |
| R indices (all data)                     | 0.0716                                                                              | 0.1031                                                                                                                                 |
| Goodness-of-fit on F <sup>2</sup>        | 1.065                                                                               | 1.114                                                                                                                                  |
| Largest diff. peak, e.Å <sup>-3</sup>    | 0.519 and -0.416                                                                    | 2.259 and -2.184                                                                                                                       |

A

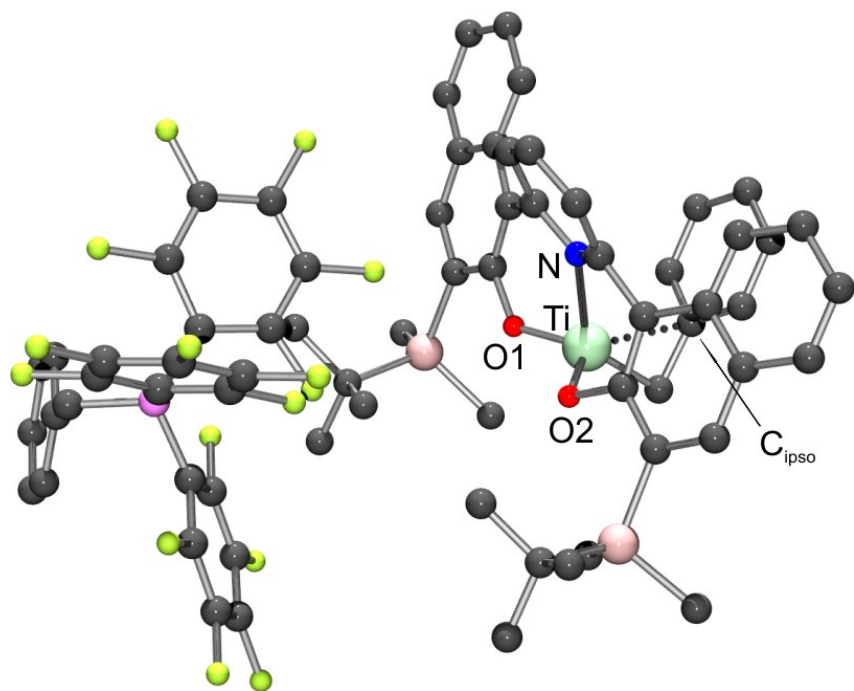

B

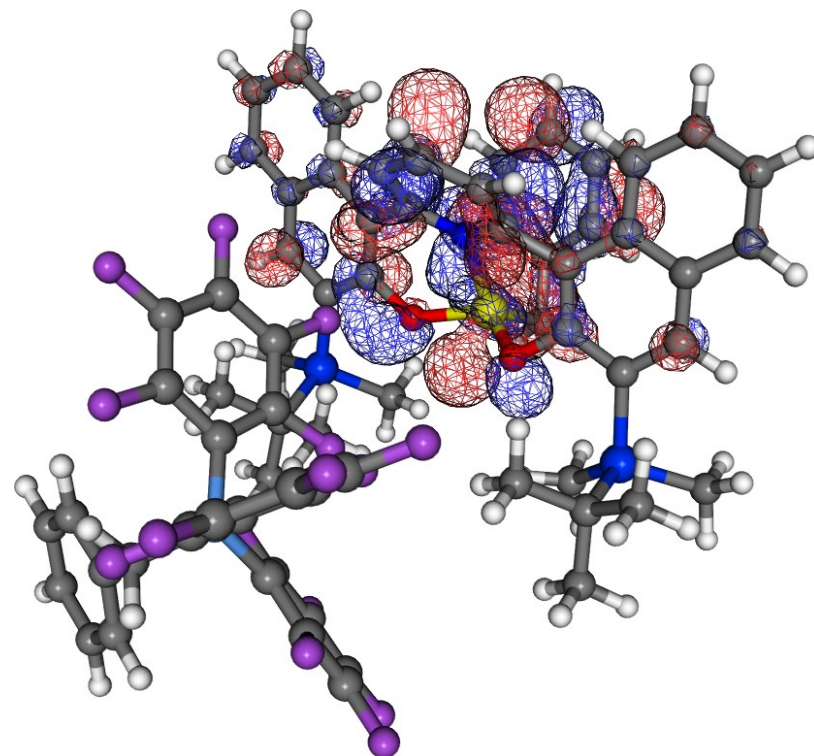

**Figure S19.** DFT data obtained from B3PW91 level calculations for OSIP **2-Ti-C<sub>5</sub>-decoord(1)**: (A) Optimized structure (all hydrogen atoms are omitted for clarity). Selected bond distances (Å) and angles (°): C (benzyl)–Ti, 2.067; C<sub>ipso</sub>(benzyl)–Ti, 2.440; N–Ti, 2.057; N–Ti–C(benzyl), 134.80; N–Ti–C<sub>ipso</sub>(benzyl), 97.90; N–Ti–O, 88.71 and 92.33; (B) Kohn-Sham LUMO (isosurface value, 0.01; –0.1249 a.u.).

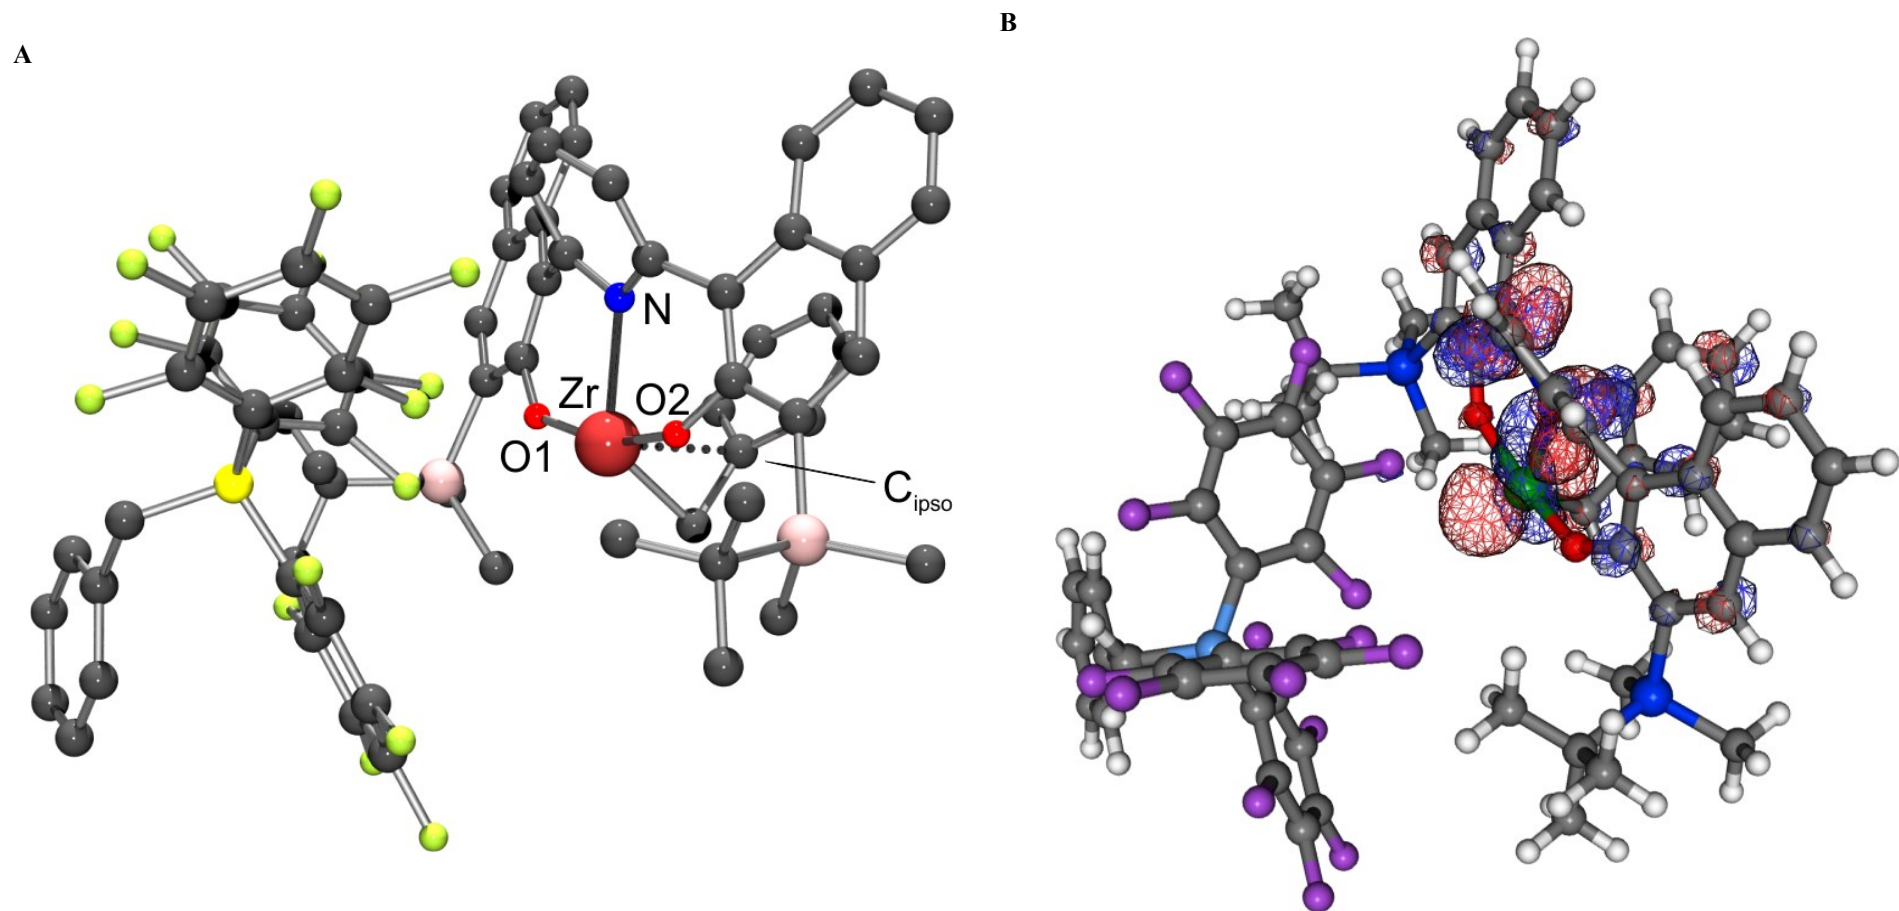

**Figure S20.** DFT data obtained from B3PW91 level calculations for OSIP **2-Zr-C<sub>5</sub>-decoord(1)**: (A) Optimized structure (all hydrogen atoms are omitted for clarity). Selected bond distances (Å) and angles (°): C (benzyl)–Zr, 2.217; C<sub>ipso</sub>(benzyl)–Zr, 2.657; N–Zr, 2.331; C–F...Zr, 3.066; N–Zr–C(benzyl), 124.43; N–Zr–C<sub>ipso</sub>(benzyl), 105.84; N–Ti–O, 81.33 and 65.43; (B) Kohn-Sham LUMO (isosurface value, 0.02; –0.1072 a.u.).

**Additional results on the polymerization activity studies.** The catalytic performance of the isolated discrete ionic complexes **2-Ti** and **2-Zr** or those generated *in situ* from the charge neutral **1-Ti** and **1-Zr** and the corresponding molecular cocatalysts  $\text{B}(\text{C}_6\text{F}_5)_3$ ,  $[\text{Ph}_3\text{C}]^+[\text{B}(\text{C}_6\text{F}_5)_4]^-$ , was briefly evaluated in the homogeneous polymerization of alkenes (propylene and styrene).

In propylene polymerization (Table S2), the ternary system **1-Zr**/[ $\text{Ph}_3\text{C}$ ]<sup>+</sup>[ $\text{B}(\text{C}_6\text{F}_5)_4$ ]<sup>-</sup>/*i*Bu<sub>3</sub>Al (used as scavenger) was found only barely active (entry 1). Whatever the activation mode in polymerization of styrene, that is either generation of active species *in situ* from **1-Ti** and  $\text{B}(\text{C}_6\text{F}_5)_3$  or direct use of isolated **2-Ti**, no significant differences in terms of polystyrene yields or molecular weight properties were observed between the corresponding runs conducted in the temperature range of 25–80 °C (Table S3, compare entries 1, 3, 5 and 2, 4, 6, respectively). Most of the polymers obtained were soluble in THF, even at room temperature. In a few cases, polystyrene samples were found insoluble in acetone (entries 3–5), that is indicative of their stereoregular<sup>1</sup> (at least, in a part) structures. However, no melting transitions were detected in any case, which suggests that stereoregular sequences are short and/or randomly distributed within polymeric chain. The **1-Zr**/ $\text{B}(\text{C}_6\text{F}_5)_3$  system was also found sluggishly active, though providing higher molecular weight atactic polymers (entries 7 and 8). In contrast with the titanium-based systems, no activity was observed for the zirconium-based analogue at 80 °C, which may reflect a lower thermal stability of this catalyst.

Polymerization of styrene using *in situ* combinations of the neutral **1-Ti** and **1-Zr** with [ $\text{Ph}_3\text{C}$ ]<sup>+</sup>[ $\text{B}(\text{C}_6\text{F}_5)_4$ ]<sup>-</sup> was also studied. The system **1-Ti**/[ $\text{Ph}_3\text{C}$ ]<sup>+</sup>[ $\text{B}(\text{C}_6\text{F}_5)_4$ ]<sup>-</sup> afforded small amounts of polystyrenes with molecular weight characteristics ( $M_n$  and  $M_w/M_n$ ) close to those of the polymers obtained using cocatalyst  $\text{B}(\text{C}_6\text{F}_5)_3$  (entries 10–12); on the other hand, **1-Zr**/[ $\text{Ph}_3\text{C}$ ]<sup>+</sup>[ $\text{B}(\text{C}_6\text{F}_5)_4$ ]<sup>-</sup> appeared to be inactive at room temperature (entry 14). This discrepancy between the Ti- and Zr-based systems in polymerization of styrene can be a result of a generally higher intrinsic stability of  $\text{Ti}^{3+}$  species, the “true” precursors responsible for syndiospecific polymerization of styrene,<sup>1,2</sup> while the Zr-based systems are typically much less active.<sup>1,3</sup>

**Table S2.** Propylene Polymerization Promoted by **1-Zr** and **3**.<sup>a</sup>

| Entry | Catalyst    | Co-catalyst                                                                                                                              | Temp. [°C] | Time [h] | m <sub>p</sub> [g] | Productivity [kg·mol <sup>-1</sup> ·h <sup>-1</sup> ] | M <sub>n</sub> <sup>b</sup> [10 <sup>3</sup> g·mol <sup>-1</sup> ] | M <sub>w</sub> /M <sub>n</sub> <sup>b</sup> |
|-------|-------------|------------------------------------------------------------------------------------------------------------------------------------------|------------|----------|--------------------|-------------------------------------------------------|--------------------------------------------------------------------|---------------------------------------------|
| 1     | <b>1-Zr</b> | [Ph <sub>3</sub> C] <sup>+</sup> [B(C <sub>6</sub> F <sub>5</sub> ) <sub>4</sub> ] <sup>-</sup> /<br><i>i</i> Bu <sub>3</sub> Al (1:100) | 50         | 2        | traces             | -                                                     | -                                                                  | -                                           |
| 2     | <b>3</b>    | MAO (1000)                                                                                                                               | 50         | 1        | 1.35               | 135                                                   | 1.4                                                                | 1.23                                        |

<sup>a</sup> General conditions: 300 mL high pressure reactor; catalysts, 10 μmol; solvent toluene, 80 mL; P = 5 bars. <sup>b</sup> Determined by GPC.



**Table S3.** Styrene Polymerization Promoted by **1-Ti**, **1-Zr**, **2-Ti**, **2-Zr** and **3**.<sup>a</sup>

| Entry           | Catalyst    | Co-catalyst                                                                                     | Temp. [°C] | Time [h] | Yield [g] | $M_n^b$ [10 <sup>3</sup> g·mol <sup>-1</sup> ] | $M_w/M_n^b$ | $T_m^c$ [°C] | PS           |
|-----------------|-------------|-------------------------------------------------------------------------------------------------|------------|----------|-----------|------------------------------------------------|-------------|--------------|--------------|
| 1               | <b>1-Ti</b> | B(C <sub>6</sub> F <sub>5</sub> ) <sub>3</sub>                                                  | 25         | 18       | 0.08      | 24.4                                           | 3.9         | -            | aPS          |
| 2               | <b>2-Ti</b> | -                                                                                               | 25         | 18       | 0.10      | 43.7                                           | 2.8         | n.o.         | aPS          |
| 3               | <b>1-Ti</b> | B(C <sub>6</sub> F <sub>5</sub> ) <sub>3</sub>                                                  | 50         | 3        | 0.02      | 19.5                                           | 2.2         | n.o.         | sPS enriched |
| 4               | <b>2-Ti</b> | -                                                                                               | 50         | 18       | 0.05      | 28.7                                           | 2.2         | n.o.         | sPS enriched |
| 5               | <b>1-Ti</b> | B(C <sub>6</sub> F <sub>5</sub> ) <sub>3</sub>                                                  | 80         | 3        | 0.08      | 25.2                                           | 2.3         | n.o.         | sPS enriched |
| 6               | <b>2-Ti</b> | -                                                                                               | 80         | 3        | 0.10      | 36.4                                           | 2.7         | -            | aPS          |
| 7               | <b>1-Zr</b> | B(C <sub>6</sub> F <sub>5</sub> ) <sub>3</sub>                                                  | 25         | 43       | 0.20      | 102                                            | 2.7         | n.o.         | aPS          |
| 8               | <b>1-Zr</b> | B(C <sub>6</sub> F <sub>5</sub> ) <sub>3</sub>                                                  | 50         | 24       | 0.10      | 205                                            | 2.6         | n.o.         | aPS          |
| 9               | <b>1-Zr</b> | B(C <sub>6</sub> F <sub>5</sub> ) <sub>3</sub>                                                  | 80         | 24       | 0         | -                                              | -           | -            | -            |
| 10              | <b>1-Ti</b> | [Ph <sub>3</sub> C] <sup>+</sup> [B(C <sub>6</sub> F <sub>5</sub> ) <sub>4</sub> ] <sup>-</sup> | 25         | 18       | 0.02      | 70.2                                           | 2.3         | -            | aPS          |
| 11              | <b>1-Ti</b> | [Ph <sub>3</sub> C] <sup>+</sup> [B(C <sub>6</sub> F <sub>5</sub> ) <sub>4</sub> ] <sup>-</sup> | 50         | 18       | 0.04      | 98.2                                           | 2.6         | n.o.         | aPS          |
| 12 <sup>d</sup> | <b>1-Ti</b> | [Ph <sub>3</sub> C] <sup>+</sup> [B(C <sub>6</sub> F <sub>5</sub> ) <sub>4</sub> ] <sup>-</sup> | 50         | 18       | 0.08      | 49.5                                           | 2.7         | -            | aPS          |
| 13              | <b>1-Ti</b> | [Ph <sub>3</sub> C] <sup>+</sup> [B(C <sub>6</sub> F <sub>5</sub> ) <sub>4</sub> ] <sup>-</sup> | 80         | 18       | 0         | -                                              | -           | -            | -            |
| 14              | <b>1-Zr</b> | [Ph <sub>3</sub> C] <sup>+</sup> [B(C <sub>6</sub> F <sub>5</sub> ) <sub>4</sub> ] <sup>-</sup> | 25         | 18       | 0         | -                                              | -           | -            | -            |
| 15 <sup>e</sup> | <b>3</b>    | MAO                                                                                             | 50         | 15       | 1.23      | 9.9                                            | 1.2         | n.o.         | sPS enriched |

<sup>a</sup> General conditions, otherwise stated: catalysts, 20 μmol; [B]/[Cat] = 1; [styrene]/[Cat] = 6500 (15 mL); Solvent = toluene (5 mL); n.o. = not observed. <sup>b</sup> Determined by GPC. <sup>c</sup> Determined by DSC. <sup>d</sup> catalyst, 40 μmol. <sup>e</sup> [styrene]/[Zr] = 3000; [Al]/[Zr] = 500.

## References

---

- <sup>1</sup> Rodrigues, A.-S.; Kirillov, E.; Carpentier, J.-F. *Coord. Chem. Rev.* **2008**, *252*, 2115–2136.
- <sup>2</sup> Mahanthappa, M. K.; Waymouth, R. M. *J. Am. Chem. Soc.* **2001**, *123*, 12093–12094.
- <sup>3</sup> Schellenberg, J. *Prog. Polym. Sci.* **2009**, *34*, 688–718.
